# Supplementary material
Source: PubMed Central journal article supplement (PMC6397034)
Supplement: supp_7.1.E140_2018-0137-original-submission.pdf [file supp_7.1.E140_2018-0137-original-submission.pdf]

1  
2  
3 **Assessment of the burden of diseases and injuries attributable to risk factors in Canada**  
4  
5 **from 1990 to 2016**  
6

7 Samiah Alam\* MSc<sup>1,2</sup>, Leah E Cahill\* RD PhD<sup>1,3</sup>, Justin J. Lang PhD<sup>4</sup>, Aaron M. Drucker MD  
8 ScM<sup>5,6</sup>, Carolyn Gotay PhD<sup>7</sup>, Nicole Kozloff MD SM<sup>8,9</sup>, Kedar Mate PhD<sup>10</sup>, Scott B. Patten MD  
9 PhD<sup>11</sup>, Heather M. Orpana PhD<sup>4,12</sup> and Ashkan Afshin MD ScD<sup>13</sup>

10 \*Co-first Authors  
11

12  
13 <sup>1</sup>Department of Medicine, Dalhousie University, Halifax, NS, Canada

14 <sup>2</sup>Department of Community Health and Epidemiology, Dalhousie University, Halifax, NS,  
15 Canada

16 <sup>3</sup>Department of Nutrition, Harvard T. H. Chan School of Public Health, Boston MS, USA

17 <sup>4</sup>Centre for Surveillance and Applied Research, Health Promotion and Chronic Disease  
18 Prevention Branch, Public Health Agency of Canada, Ottawa, ON, Canada.

19 <sup>5</sup>Division of Dermatology, Department of Medicine, University of Toronto and Women's  
20 College Hospital and Women's College Research Institute, Toronto, ON, Canada.

21 <sup>6</sup>Department of Dermatology, Warren Alpert Medical School, Brown University, Providence, RI,  
22 USA

23 <sup>7</sup>Centre of Excellence in Cancer Prevention, Faculty of Medicine, School of Population and  
24 Public Health, The University of British Columbia, Vancouver, BC, Canada.

25 <sup>8</sup>Centre for Addiction and Mental Health, Toronto, ON, Canada

26 <sup>9</sup>Department of Psychiatry, University of Toronto, Toronto, ON, Canada

27 <sup>10</sup>School of Physical and Occupational Therapy, McGill University, Montreal, QC, Canada.

28 <sup>11</sup>Departments of Community Health Sciences and Psychiatry, University of Calgary, Calgary,  
29 AB, Canada.

30 <sup>12</sup>School of Psychology, University of Ottawa, Ottawa, ON, Canada

31 <sup>13</sup>Institute for Health Metrics and Evaluation, Seattle, WA, USA  
32

33  
34 **Corresponding author:** Leah Cahill, Department of Medicine, Dalhousie University, 5790  
35 University Ave, Halifax NS, Canada, B3H 1V7. Email: leah.cahill@dal.ca.  
36

37  
38 **Funding statement:** This research was partially funded by the Bill & Melinda Gates  
39 Foundation; the funders had no role in the study design, data analysis, data interpretation, or  
40 writing of the report. Samiah Alam was the recipient of an experiential learning fund through the  
41 Direct Skills Link program with the Department of Labour and Advanced Education,  
42 Government of Nova Scotia, Canada.  
43

44  
45 **Declaration of author(s) competing interests:** We have no conflicts of interest to declare.  
46  
47

48  
49  
50 **Word count:** 2509

51  
52 **Abstract word count:** 250  
53  
54  
55  
56  
57  
58  
59  
60

## ABSTRACT

**Background:** An understanding of the risk factors contributing to significant health issues in Canada is critical for informing national health policy.

**Methods:** We conducted a systematic analysis of the epidemiology describing disease states and injuries in relation to risk factors in Canada as part of the Global Burden of Disease study. Disease burden (metrics were disability-adjusted life years [DALYs, “healthy years of life lost”], total deaths, and years lived with disability [YLDs]) attributable to each metabolic, environmental, and behavioural risk factor was determined and ranked for the year 2016, with further examination of changes over time from 1990 to 2016.

**Results:** In 2016, for all Canadians combined, the risk factors accounting for the largest percentage of DALYs were (1) tobacco, (2) diet, (3) high body-mass index (BMI), (4) high fasting plasma glucose (FPG), (5) high systolic blood pressure, (6) alcohol and drug use, (7) occupational risks, (8) high total cholesterol, (9) impaired kidney function, and (10) air pollution. Rankings of the top risk factor rates remained similar from 1990 to 2016 despite some substantial declines in the burden attributable to these risks, including a 47% decline in the age-standardized DALY rate attributable to tobacco since 1990. Risk factors with increasing contribution to DALY rates from 1990 to 2016 include high BMI, high FPG, and alcohol and drug use.

**Interpretation:** Metabolic and behavioural risk factors, including modifiable factors such as tobacco use and diet, remain the leading risk factors contributing to the burden of diseases and injuries in Canada since 1990.

## 22 INTRODUCTION

23 In Canada, modifiable behavioural factors such as smoking, diet, and physical activity are  
24 major determinants of life expectancy,<sup>1</sup> indicating that actionable preventive strategies can lead  
25 to improved health outcomes. An understanding of Canada's foremost health problems, their risk  
26 factors, and how both are changing over time is crucial to inform national health policy and  
27 programs. However, disease burden has traditionally been defined in terms of mortality alone,  
28 which misses additional health burden, such as living with a disability. It is difficult for  
29 policymakers and researchers to set priorities when disparate diseases and injuries affect  
30 population health in diverse ways, and the measurement of their contributions to health burden is  
31 not standardized. Therefore, an analysis that examines health loss from both disability and death  
32 on the same scale in relation to attributable risk factors is warranted.

33 The Global Burden of Diseases, Injuries, and Risk Factors Study (GBD) is a systematic,  
34 scientific effort to quantify the comparative magnitude of health loss due to disease, injuries, and  
35 risk factors throughout the world to inform evidence-based policymaking.<sup>2</sup> In the GBD, the goal  
36 is not just to measure which diseases or injuries cause death, but also to measure which diseases  
37 and injuries prevent someone from living a productive, active, and full life.<sup>3</sup>

38 Worldwide, life expectancy is increasing, and the burden of disease is shifting from  
39 infectious to chronic diseases; changes in the distribution of risk factors are one of the factors  
40 driving this shift, especially among high-income countries.<sup>4</sup> GBD estimates have recently been  
41 summarized for some countries, including the US<sup>5</sup> and the UK.<sup>6</sup> However, the estimates for  
42 Canada have not yet been similarly presented. The objective of this paper is to identify the  
43 leading risk factors associated with the burden of diseases and injuries in Canada from 1990 to  
44 2016.

## 45 **METHODS**

46 We examined GBD data for Canada from 1990 to 2016. The GBD study is led by the  
47 Institute for Health Metrics and Evaluation (IHME) at the University of Washington with the  
48 goal of systematically quantifying the global health loss due to diseases, injuries, and risk factors  
49 to inform evidence-based policymaking.<sup>7</sup> The key principles, methodologies, and assumptions of  
50 the GBD study have been reported elsewhere;<sup>8-13</sup> a brief overview of the strategy for comparative  
51 risk assessment is provided below.

52 For each disease, injury, and risk factor, GBD estimates the relative risk and risk factor  
53 exposure frequencies by collecting and analyzing a continuous stream of the most up-to-date  
54 data available from over 20,000 randomized controlled trials, cohorts, household surveys, census  
55 data, vital registration data, satellite data, and other resources.<sup>14</sup> The GBD analytic team extracts  
56 data into centralized databases to model specific diseases, injuries, and risk factors. The  
57 Canadian data are pooled from over 600 sources of data, of which 133 were used for the risk  
58 factors assessment (listed in **Supplementary Table 1**). Details of the statistical models used to  
59 pool data, adjust for bias, and incorporate covariates have been published elsewhere.<sup>14</sup> The GBD  
60 study is compliant with the Guidelines for Accurate and Transparent Health Estimates Reporting  
61 (GATHER), a set of guidelines that promote best practices in reporting health estimates.<sup>15</sup>  
62 Figures are generated using the GBD Compare data visualization tool, which is publicly  
63 available (<http://vizhub.healthdata.org/gbd-compare>).<sup>16</sup> Burden estimates are accompanied by  
64 95% uncertainty intervals that incorporate both sampling error and error from model estimation.

### 66 *Measurement of burden*

1  
2  
3 67 This paper measures and reports health loss through three well-established metrics  
4  
5 68 previously described:<sup>9,11</sup> (1) a summation of premature death and disability (disability-adjusted  
6  
7 69 life years [DALYs]); (2) death (total deaths); and (3) disability (years of life lived with disability  
8  
9 70 [YLDs]<sup>17-19</sup>). One DALY is equivalent to one year of healthy life (free of disease, injury, or  
10  
11 71 disability) lost.<sup>9</sup>  
12  
13  
14  
15 72

### 17 73 *Selection of risk factors*

19 74 In the GBD study, a risk is an attribute, behaviour, exposure, or another factor causally  
20  
21 75 associated with an increased probability of developing a disease or experiencing an injury. The  
22  
23 76 GBD risk factors team evaluated 2,579 studies to establish causality for 481 risk-outcome pairs  
24  
25 77 that met the World Cancer Research Fund evidence grading criteria for evidence<sup>15</sup> that is  
26  
27 78 biologically plausible and shows consistent associations between exposure and disease, with  
28  
29 79 little or no evidence to the contrary. The primary sources of evidence were independent  
30  
31 80 prospective studies, such as randomized controlled trials, non-randomized interventions, and  
32  
33 81 cohort studies.<sup>15</sup>  
34  
35  
36  
37

38 82 We used a comparative risk assessment (CRA) conceptual framework that employs a  
39  
40 83 causal web in which the risks that are responsible for the health outcomes are organized into four  
41  
42 84 hierarchical, mutually exclusive and collectively exhaustive levels.<sup>20,14</sup> Level 1 includes three  
43  
44 85 categories of risk factors (behavioural, environmental and occupational, and metabolic) that  
45  
46 86 distribute into 17 Level 2 risk factors as either single risks or risk clusters (**Supplementary**  
47  
48 87 **Table 2**). While not included within the scope of this present paper, Levels 3 and 4 have 50 and  
49  
50 88 67 risk factors, respectively.  
51  
52  
53  
54 89

### 90 *Attributable burden estimation*

91 The calculation of attributable burden for a risk factor has four components: exposure  
92 levels for the risk, the relative risk of a health outcome related to the risk exposure, a  
93 counterfactual (in this case, optimal) level of risk factor exposure, and the burden metric  
94 (DALYs, number of deaths, or YLDs).<sup>14</sup> For example, to estimate the burden of diabetes due to  
95 high body-mass index (BMI), the exposure level will be the mean, standard deviation, and shape  
96 of BMI distribution by age, sex, country, and year. The relative risk is the incidence and  
97 mortality due to diabetes per level increase in BMI. The counterfactual level of the risk factor  
98 exposure is the optimal BMI exposure level that minimizes risk for everyone in the population,  
99 called theoretical minimum risk exposure level (TMREL). These input data are used to estimate  
100 the population attributable fraction (PAF), which is the proportion of the disease burden that  
101 could have been prevented if the BMI was at the TMREL or optimal level. The PAF is then  
102 multiplied by the disease-specific burden metric to obtain attributable disease burden for each  
103 risk-outcome pair.

### 105 *Decomposition analysis*

106 To explain the drivers of our observed trends in Canada's risk-attributable disease and  
107 injury burden, we conducted a decomposition analysis to examine the percentage change in  
108 Canada's risk-attributable DALYs over time due to (1) population growth; (2) population aging;  
109 (3) risk-deleted mortality rates (the expected mortality that would be observed if all risk factors  
110 included in GBD 2016 were removed); and (4) exposure to all risk factors included in GBD  
111 2016. Methods were based on those of Das Gupta<sup>21</sup> and adapted for GBD as described  
112 elsewhere.<sup>12</sup>

113

## 114 RESULTS

115 In Canada 39.6% (36.9–42.3) of DALYs, 56.0% (53.6–58.2) of deaths, and 24.2% (22.7–  
116 25.8) of YLDs could be attributed to risk factors assessed in 2016.

117

### 118 *Top 10 risk factors for attributable DALYs*

119 In 2016, the 10 leading risk factors in Canada contributing to DALYs (% of total DALYs  
120 [95% UI]) were tobacco (10.6% [9.4–11.9]), dietary risks (9.4% [7.7–11.2]), high BMI (9.0%  
121 [6.2–11.8]), high FPG (7.3% [5.8–9.2]), high systolic blood pressure (SBP, 7.1% [6.0–8.2]),  
122 alcohol and drug use (6.9% [5.8–8.1]), occupational risks (4.8% [4.4–5.3]), high total cholesterol  
123 (3.7% [2.9–4.6]), impaired kidney function (2.1% [1.9–2.3]), and air pollution (1.3% [1.0–1.7])  
124 (**Figure 1**). Women and men were similar in the leading risk factors related to DALYs, except  
125 for alcohol and drug use (ranked higher for men) and high SBP (ranked higher for women).  
126 Stratification by age group also revealed differences in risk factor attribution (Supplementary  
127 Figures 7 and 8).

128

### 129 *Top five risk factors for attributable deaths and YLDs*

130 In terms of total deaths in Canada, the five leading attributable risk factors (% of total  
131 deaths [95% UI]) were dietary risks (17.6% [14.7–20.5]), tobacco (17.5% [16.6–18.5]), high  
132 SBP (14.7% [12.3–17.2]), high FPG (11.2% [7.9–15.3]), and high BMI (10.8% [6.9–15.0])  
133 (**Figure 2**). Dietary and tobacco risk factors were the largest contributors to deaths in Canada,  
134 responsible for 47,947 (95% UI: 39,935–56,181) and 47,737 (44,704–51,114) deaths,

1  
2  
3 135 respectively. High BMI was the top risk factor contributing to YLDs in Canada (7.3% [5.1–9.4]),  
4  
5 136 followed by high FPG (5.5% [4.8–6.3]) and alcohol and drug use (5.4% [4.5–6.5]) (**Figure 3**).  
6  
7  
8 137

### 9 10 138 *Trends from 1990 to 2016 for DALYs, deaths, and YLDs*

11  
12 139 Since 1990, exposure to tobacco has continued to be the leading risk factor for DALYs  
13  
14 140 even though a 26% decline in the attributable all-age DALY rate and a 47% decline in the age-  
15  
16 141 standardized DALY rate were observed over the last 26 years (**Figure 4**). High BMI and high  
17  
18 142 FPG have both increased in ranking to become the third and fourth leading risk factors. Alcohol  
19  
20 143 and drug use attributable all-age and age-standardized DALY rates have increased by 13% and  
21  
22 144 9% since 1990. The all-age attributable DALY rate for high SBP and high cholesterol have  
23  
24 145 decreased by 34% and 44% since 1990, leading to improvements in their respective rankings.  
25  
26  
27

28 146 Among the leading risk factors contributing to total deaths, the only risk factor  
29  
30 147 contributing to a substantial increase in the death rate from 1990 to 2016 was high BMI, which  
31  
32 148 increased by 22% (**Figure 5**). Alcohol and drug use ranked ninth as an attributable risk for  
33  
34 149 deaths, but its contribution to the all-age and age-standardized death rates has risen by 66% and  
35  
36 150 36%, respectively, since 1990. The risk factors contributing to YLDs have changed from 1990,  
37  
38 151 with high BMI and high FPG becoming the top two risk factors, reflecting a 61% and 40%  
39  
40 152 increase in the all-age attributable YLD rates associated with these risk factors (**Figure 6**).  
41  
42  
43  
44  
45 153

### 46 47 154 *Drivers of observed trends in risk-attributable DALYs*

48  
49 155 Our decomposition analysis separated out the relative contributions of risk factors from  
50  
51 156 those of population growth, aging, and risk-deleted mortality rate, revealing that risk factor  
52  
53 157 exposure related to communicable and non-communicable diseases is on the decrease in Canada,  
54  
55  
56  
57  
58  
59  
60



1  
2  
3 158 while the percentage of injuries due to risk factor exposure is increasing (**Figure 7**). For all ages  
4  
5 159 together, exposure to risk factors is accountable for a decreasing percentage of health burden in  
6  
7 160 Canada. However, stratification by age group reveals that exposure to risk factors is accountable  
8  
9 161 for an increasing percentage of health burden in Canadians aged 5-9 and 20-39 years.  
10  
11  
12 162

## 13 14 163 **INTERPRETATION**

15  
16  
17 164 Of the risk factors included in our GBD study data, the top two risk factors related to  
18  
19 165 health burden in Canada are tobacco and diet. We observed that this ranking has remained  
20  
21 166 relatively unchanged since 1990, despite simultaneously detecting a substantial decline in burden  
22  
23 167 due to diet and especially tobacco in the last 26 years. Although still a leading risk factor,  
24  
25 168 tobacco exposure as a burden for DALYs was much lower in Canadians younger than 49 years,  
26  
27 169 which is consistent with historical patterns of tobacco use and the longer latency period of lung  
28  
29 170 cancer and other tobacco-related diseases.<sup>22,23</sup> Dietary risk has remained the second highest risk  
30  
31 171 factor over the last two decades, contributing to large amounts of DALYs caused by ischemic  
32  
33 172 heart disease, stroke, and diabetes in Canada,<sup>16</sup> and relating to intermediary risk factors including  
34  
35 173 high BMI and high FPG,<sup>12</sup> which are now the third and fourth most significant causes of health  
36  
37 174 loss. High SBP and high total cholesterol have decreased, but they remain important risk factors,  
38  
39 175 along with alcohol and drug use.  
40  
41  
42 176

### 43 44 45 177 ***Comparison to previous studies***

46  
47  
48 178 Few previous studies have undertaken the task of identifying the top attributable risk  
49  
50 179 factors to disease burden in Canada, and those that did focused primarily on mortality as an  
51  
52 180 outcome. For example, the results of the present study are comparable to recently published  
53  
54  
55  
56  
57  
58  
59  
60

1  
2  
3 181 findings from the Mortality Population Risk Tool (MPoRT), which reported that 50% of deaths  
4  
5 182 in Canada could be attributed to the four behavioural risk factors they assessed (smoking,  
6  
7 183 unhealthy alcohol consumption, physical inactivity, and poor diet).<sup>1</sup> Similar to results from our  
8  
9 184 analysis, smoking was the leading unhealthy behaviour contributing to deaths for men, despite a  
10  
11 185 continuing decrease in the prevalence of smoking in Canada.<sup>1</sup> Steensma *et al.* also demonstrated  
12  
13 186 significant health loss in the Canadian population associated with high BMI.<sup>24</sup> A 2006 analysis  
14  
15 187 reported that alcohol is a major contributor to mortality in Canada,<sup>25</sup> as we also observed in the  
16  
17 188 present study, and as was reported in a previous (2005) GBD analysis of the premature mortality  
18  
19 189 attributable to alcohol consumption in Canada.<sup>26</sup> Recent analyses of the American GBD study  
20  
21 190 data<sup>5</sup> and UK GBD study data<sup>6</sup> also reported that the two leading risk factors contributing to  
22  
23 191 health burden were tobacco and dietary factors.<sup>5</sup>  
24  
25  
26  
27  
28  
29  
30

### 31 ***Limitations***

32  
33 194 A study of this size and scope has several limitations, many of which have been  
34  
35 195 previously addressed in other GBD publications.<sup>2,17</sup> The present analysis used Canadian data  
36  
37 196 from numerous sources across the country; however, important sources of data may not have  
38  
39 197 been included in the GBD study yet. Our aim is that this current analysis will be the first in an  
40  
41 198 ongoing assessment of the burden of disease in Canada and that with each iteration, our analysis  
42  
43 199 will benefit from newly identified or collected data sources. One major limitation to the  
44  
45 200 interpretation of our study's findings is that we could not incorporate data on the social  
46  
47 201 determinants of health (such as housing, income, ethnicity, and education) that strongly influence  
48  
49 202 risk factors<sup>27,28</sup> and differ vastly by community.<sup>29,30</sup> Obtaining such adequately detailed data is a  
50  
51 203 future goal of ours, given that social determinants of health have been shown to be crucially  
52  
53  
54  
55  
56  
57  
58  
59  
60

1  
2  
3 204 important to population health.<sup>31,32,33</sup> There may also be other risk factors that are important but  
4  
5 205 not included in the GBD, including psychosocial factors such as social isolation and  
6  
7 206 loneliness.<sup>34,35</sup> Another limitation is that some diseases, such as depression and migraines, have  
8  
9  
10 207 high burden and prevalence, but little to no risk factor attributions in the present analysis. The  
11  
12 208 present study did not assess why risk factors rose or fell in their rankings, which could represent  
13  
14  
15 209 a worsening scenario or an improvement in other areas.  
16  
17 210

### 19 211 ***Conclusion and future directions***

21 212 The present GBD Canada study, with its multiple countrywide data sources and  
22  
23 213 comprehensive analysis of both disability and premature death on the same scale in relation to  
24  
25 214 risk factors, provides a unique assessment and ranking of the risk factors attributable to health  
26  
27 215 loss in Canada. Modifiable metabolic and behavioural risk factors such as tobacco and diet have  
28  
29 216 remained the leading risk factors in Canada for the last 26 years, identifying opportunities for  
30  
31 217 reducing Canada's health burden. These findings stand despite some substantial declines in risk  
32  
33 218 factor exposure, indicating that risk factors can influence the population for a substantial length  
34  
35 219 of time, and that decreasing health burden for Canadians requires a long-term commitment to  
36  
37 220 risk reduction. Future analyses are warranted that focus on specific risk factors, detailing their  
38  
39 221 complexities. For example, our present analysis did not specify the precise dietary factors (such  
40  
41 222 as lack of fruit, excess sweetened beverages) that contribute to health burden and could be a  
42  
43 223 target for new policy. Another area of high burden where a future detailed analysis could lead to  
44  
45 224 enhanced action for population health benefits is drug use, especially given the recent opioid-  
46  
47 225 related burden and incoming cannabis legalization. Canadian GBD data provide inimitable  
48  
49 226 insight into the relative magnitude of many important risk factors' contribution to health loss and  
50  
51  
52  
53  
54  
55  
56  
57  
58  
59  
60

1  
2  
3 227 can guide decision-makers as they identify the priorities and opportunities for reducing  
4  
5 228 premature death and disability burden among Canadians.

6  
7  
8 229

9  
10 230 **Acknowledgments**

11  
12 231 This research is conducted as part of the Global Burden of Diseases, Injuries, and Risk Factors  
13  
14 232 Study (GBD), led by the Institute for Health Metrics and Evaluation. The GBD study was  
15  
16 233 partially funded by the Bill & Melinda Gates Foundation; the funders had no role in the study  
17  
18 234 design, data analysis, data interpretation, or writing of the report. Samiah Alam was the recipient  
19  
20 235 of an Experiential Learning fund through the Direct Skills Link program with the Department of  
21  
22 236 Labour and Advanced Education, Government of Nova Scotia, Canada.  
23  
24  
25  
26  
27  
28  
29  
30  
31  
32  
33  
34  
35  
36  
37  
38  
39  
40  
41  
42  
43  
44  
45  
46  
47  
48  
49  
50  
51  
52  
53  
54  
55  
56  
57  
58  
59  
60

## REFERENCES

1. Manuel DG, Perez R, Sanmartin C, et al. Measuring Burden of Unhealthy Behaviours Using a Multivariable Predictive Approach: Life Expectancy Lost in Canada Attributable to Smoking, Alcohol, Physical Inactivity, and Diet. *PLoS Med.* 2016;13(8):e1002082.
2. Mortality GBD, Causes of Death C. Global, regional, and national age-sex specific all-cause and cause-specific mortality for 240 causes of death, 1990-2013: a systematic analysis for the Global Burden of Disease Study 2013. *Lancet.* 2015;385(9963):117-171.
3. Smith JN. *Epic Measures: One Doctor. Seven Billion Patients.* 1 ed. New York, NY: HarperCollins; 2015.
4. DALYs GBD, Collaborators H, Murray CJ, et al. Global, regional, and national disability-adjusted life years (DALYs) for 306 diseases and injuries and healthy life expectancy (HALE) for 188 countries, 1990-2013: quantifying the epidemiological transition. *Lancet.* 2015;386(10009):2145-2191.
5. Murray CJ, Atkinson C, Bhalla K, et al. The state of US health, 1990-2010: burden of diseases, injuries, and risk factors. *JAMA.* 2013;310(6):591-608.
6. Murray CJ, Richards MA, Newton JN, et al. UK health performance: findings of the Global Burden of Disease Study 2010. *Lancet.* 2013;381(9871):997-1020.
7. Murray CJL, Lopez AD. Measuring global health: motivation and evolution of the Global Burden of Disease Study. *Lancet.* 2017;390(10100):1460-1464.
8. Collaborators GBDM. Global, regional, and national under-5 mortality, adult mortality, age-specific mortality, and life expectancy, 1970-2016: a systematic analysis for the Global Burden of Disease Study 2016. *Lancet.* 2017;390(10100):1084-1150.

- 1  
2  
3 9. Collaborators GDaH. Global, regional, and national disability-adjusted life-years  
4 (DALYs) for 333 diseases and injuries and healthy life expectancy (HALE) for 195  
5 countries and territories, 1990–2016: a systematic analysis for the Global Burden of  
6 Disease Study 2016. *Lancet*. 2017;390(10100):1260-1344.  
7  
8  
9
- 10 10. Collaborators GDaHaP. Global, regional, and national incidence, prevalence, and years  
11 lived with disability for 328 diseases and injuries for 195 countries, 1990–2016: a  
12 systematic analysis for the Global Burden of Disease Study 2016. *Lancet*.  
13 2017;390(10100):1211-1259.  
14  
15  
16
- 17 11. Collaborators GM. Global, regional, and national under-5 mortality, adult mortality, age-  
18 specific mortality, and life expectancy, 1970–2016: a systematic analysis for the Global  
19 Burden of Disease Study 2016. *Lancet*. 2017;390(10100):1084-1150.  
20  
21  
22
- 23 12. Collaborators GRF. Global, regional, and national comparative risk assessment of 84  
24 behavioural, environmental and occupational, and metabolic risks or clusters of risks,  
25 1990–2016: a systematic analysis for the Global Burden of Disease Study 2016. *Lancet*.  
26 2017;390(10100):1345-1422.  
27  
28  
29
- 30 13. Collaborators GS. Measuring progress and projecting attainment on the basis of past  
31 trends of the health-related Sustainable Development Goals in 188 countries: an analysis  
32 from the Global Burden of Disease Study 2016. *Lancet*. 2017;390(10100):1423-1459.  
33  
34  
35
- 36 14. Collaborators GRF. Global, regional, and national comparative risk assessment of 79  
37 behavioural, environmental and occupational, and metabolic risks or clusters of risks,  
38 1990-2015: a systematic analysis for the Global Burden of Disease Study 2015. *Lancet*.  
39 2016;388(10053):1659-1724.  
40  
41  
42  
43  
44  
45  
46  
47  
48  
49  
50  
51  
52  
53  
54  
55  
56  
57  
58  
59  
60

15. Stevens GA, Alkema L, Black RE, et al. Guidelines for Accurate and Transparent Health Estimates Reporting: the GATHER statement. *Lancet*. 2016;388(10062):e19-e23.
16. (IHME) IfHMaE. GBD Compare Data Visualization. 2016; <http://vizhub.healthdata.org/gbd-compare>. Accessed October 30, 2017.
17. Global Burden of Disease Study C. Global, regional, and national incidence, prevalence, and years lived with disability for 301 acute and chronic diseases and injuries in 188 countries, 1990-2013: a systematic analysis for the Global Burden of Disease Study 2013. *Lancet*. 2015;386(9995):743-800.
18. Haagsma JA, Maertens de Noordhout C, Polinder S, et al. Assessing disability weights based on the responses of 30,660 people from four European countries. *Population health metrics*. 2015;13:10.
19. Salomon JA, Haagsma JA, Davis A, et al. Disability weights for the Global Burden of Disease 2013 study. *Lancet Global health*. 2015;3(11):e712-723.
20. Murray CJ, Lopez AD. On the comparable quantification of health risks: lessons from the Global Burden of Disease Study. *Epidemiology*. 1999;10(5):594-605.
21. Gupta PD. Standardization and Decomposition of Rates: A User's Manual. US Department of Commerce, Economics and Statistics Administration, Bureau of the Census, 1993.
22. Shibuya K, Inoue M, Lopez AD. Statistical modeling and projections of lung cancer mortality in 4 industrialized countries. *Int J Cancer*. 2005;117(3):476-485.
23. Jaakkola MS, Samet JM. Occupational exposure to environmental tobacco smoke and health risk assessment. *Environ Health Perspect*. 1999;107 Suppl 6:829-835.

- 1  
2  
3 24. Steensma C, Loukine L, Orpana H, et al. Comparing life expectancy and health-adjusted  
4 life expectancy by body mass index category in adult Canadians: a descriptive study.  
5  
6 *Population health metrics*. 2013;11(1):21.  
7  
8  
9  
10 25. Rehm J, Patra J, Popova S. Alcohol-attributable mortality and potential years of life lost  
11 in Canada 2001: implications for prevention and policy. *Addiction*. 2006;101(3):373-384.  
12  
13  
14 26. Shield KD, Taylor B, Kehoe T, Patra J, Rehm J. Mortality and potential years of life lost  
15 attributable to alcohol consumption in Canada in 2005. *BMC Public Health*. 2012;12:91.  
16  
17  
18  
19 27. Williams DR, Priest N, Anderson NB. Understanding associations among race,  
20 socioeconomic status, and health: Patterns and prospects. *Health Psychol*.  
21  
22 2016;35(4):407-411.  
23  
24  
25  
26 28. Kyu HH, Georgiades K, MacMillan HL, Boyle MH. Community- and individual-level  
27 factors associated with smoking and heavy drinking among Aboriginal people in Canada.  
28  
29 *Can J Public Health*. 2015;106(2):e22-28.  
30  
31  
32  
33 29. Williams DR, Mohammed SA, Leavell J, Collins C. Race, socioeconomic status, and  
34 health: complexities, ongoing challenges, and research opportunities. *Ann N Y Acad Sci*.  
35  
36 2010;1186:69-101.  
37  
38  
39  
40 30. Manuel DG, Leung M, Nguyen K, Tanuseputro P, Johansen H, Canadian Cardiovascular  
41 Outcomes Research T. Burden of cardiovascular disease in Canada. *Can J Cardiol*.  
42  
43 2003;19(9):997-1004.  
44  
45  
46  
47 31. Prus SG. Comparing social determinants of self-rated health across the United States and  
48  
49 Canada. *Soc Sci Med*. 2011;73(1):50-59.  
50  
51  
52  
53  
54  
55  
56  
57  
58  
59  
60



- 1  
2  
3 32. Lee DS, Chiu M, Manuel DG, et al. Trends in risk factors for cardiovascular disease in  
4 Canada: temporal, socio-demographic and geographic factors. *CMAJ*. 2009;181(3-  
5 4):E55-66.  
6  
7  
8  
9  
10 33. Diabetes Prevention Program Research G, Knowler WC, Fowler SE, et al. 10-year  
11 follow-up of diabetes incidence and weight loss in the Diabetes Prevention Program  
12 Outcomes Study. *Lancet*. 2009;374(9702):1677-1686.  
13  
14  
15  
16  
17 34. Holt-Lunstad J, Smith TB, Baker M, Harris T, Stephenson D. Loneliness and social  
18 isolation as risk factors for mortality: a meta-analytic review. *Perspect Psychol Sci*.  
19 2015;10(2):227-237.  
20  
21  
22  
23  
24 35. Valtorta NK, Kanaan M, Gilbody S, Ronzi S, Hanratty B. Loneliness and social isolation  
25 as risk factors for coronary heart disease and stroke: systematic review and meta-analysis  
26 of longitudinal observational studies. *Heart*. 2016;102(13):1009-1016.  
27  
28  
29  
30  
31  
32  
33  
34  
35  
36  
37  
38  
39  
40  
41  
42  
43  
44  
45  
46  
47  
48  
49  
50  
51  
52  
53  
54  
55  
56  
57  
58  
59  
60

## FIGURE TITLES

*Please note: Figures 1-3 share the same set-up and legend and work well as one 3-part figure to save considerable space and have a nice visual comparison (this figure would be entitled 'Burden of disease attributable to leading risk factors for all Canadians in 2016 expressed as a percentage of (A) disability-adjusted life years (DALYs), (B) total deaths, and (C) years lived with disability (YLDs)'. Similarly, figures 4-6 share the same set-up and legend and could nicely be made as 1 figure with parts A, B, and C to save space and have a visual comparison. We have these figures listed separately as 6 figures in this version so that you can match the corresponding supplementary figures which are stratified into men and women. However, we could have less figures and less supplementary figures, if you would prefer.*

**Figure 1.** Burden of disease attributable to leading risk factors for all Canadians in 2016 expressed as a percentage of disability-adjusted life years (DALYs).

**Figure 2.** The burden of disease attributable to leading risk factors for Canadians in 2016 expressed as a percentage of total deaths.

**Figure 3.** The burden of disease attributable to leading risk factors for Canadians in 2016 expressed as a percentage of years lived with disability (YLDs).

**Figure 4.** Rank changes in disability-adjusted life years (DALYs) attributable to leading risk factors and percent change in all-age and age-standardized DALY rates in Canada from 1990-2016.

**Figure 5.** Rank changes of total deaths attributable to leading risk factors and percent change in all-age and age-standardized death rates in Canada between 1990-2016 for females and males combined.

**Figure 6.** Rank changes of years lived with disability (YLDs) attributable to leading risk factors and percent change in all-age and age-standardized YLD rates in Canada between 1990-2016 for females and males combined.

**Figure 7.** Drivers of percent changes in Canada's risk-attributable disease and injury burden from 2006 to 2016 due to population growth, population aging, risk-deleted mortality, and exposure to risk factors expressed as (A) disability-adjusted life years (DALYs) for all ages, (B) deaths for all ages and (C) DALYs by age group.

**Figure 1.** Burden of disease attributable to leading risk factors for all Canadians in 2016 expressed as a percentage of disability-adjusted life years (DALYs)

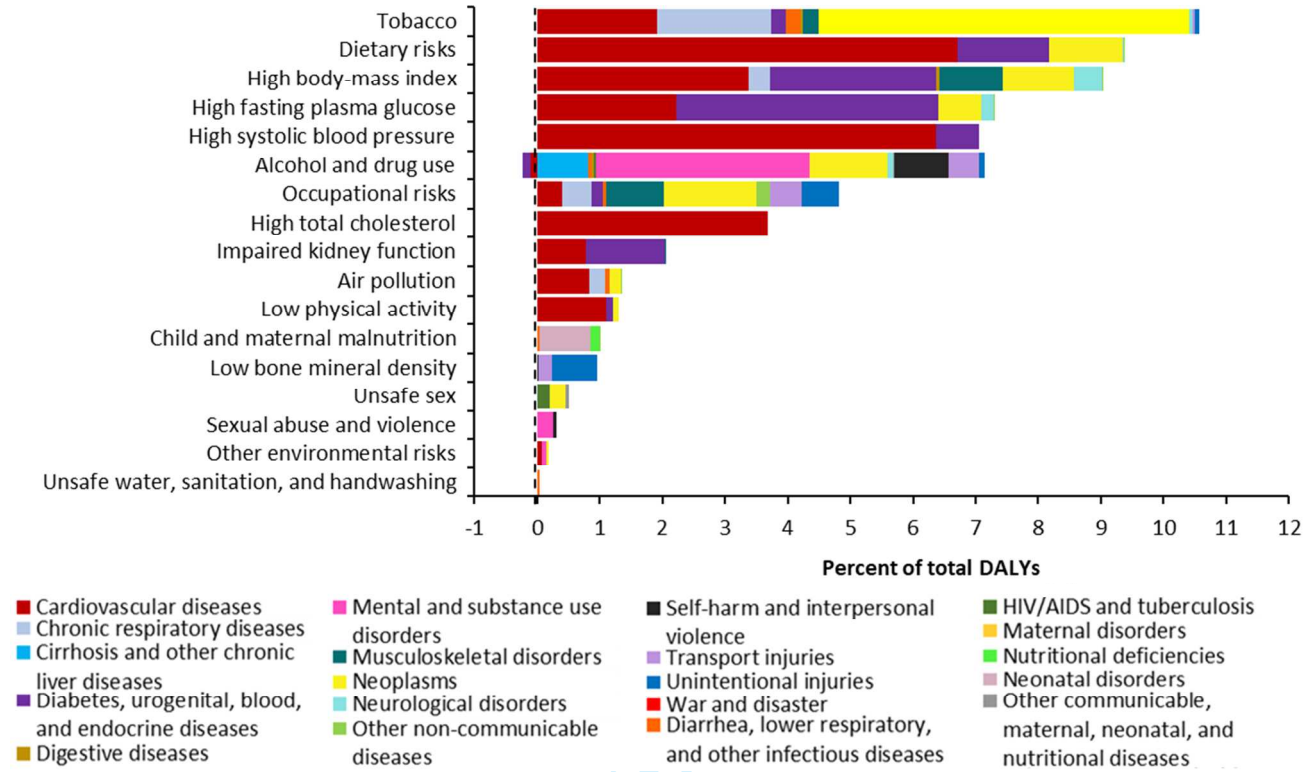

One DALY is equivalent to one year of healthy life (free of disease, injury, or disability) that has been lost.

**Figure 2.** The burden of disease attributable to leading risk factors for Canadians in 2016 expressed as a percentage of total deaths

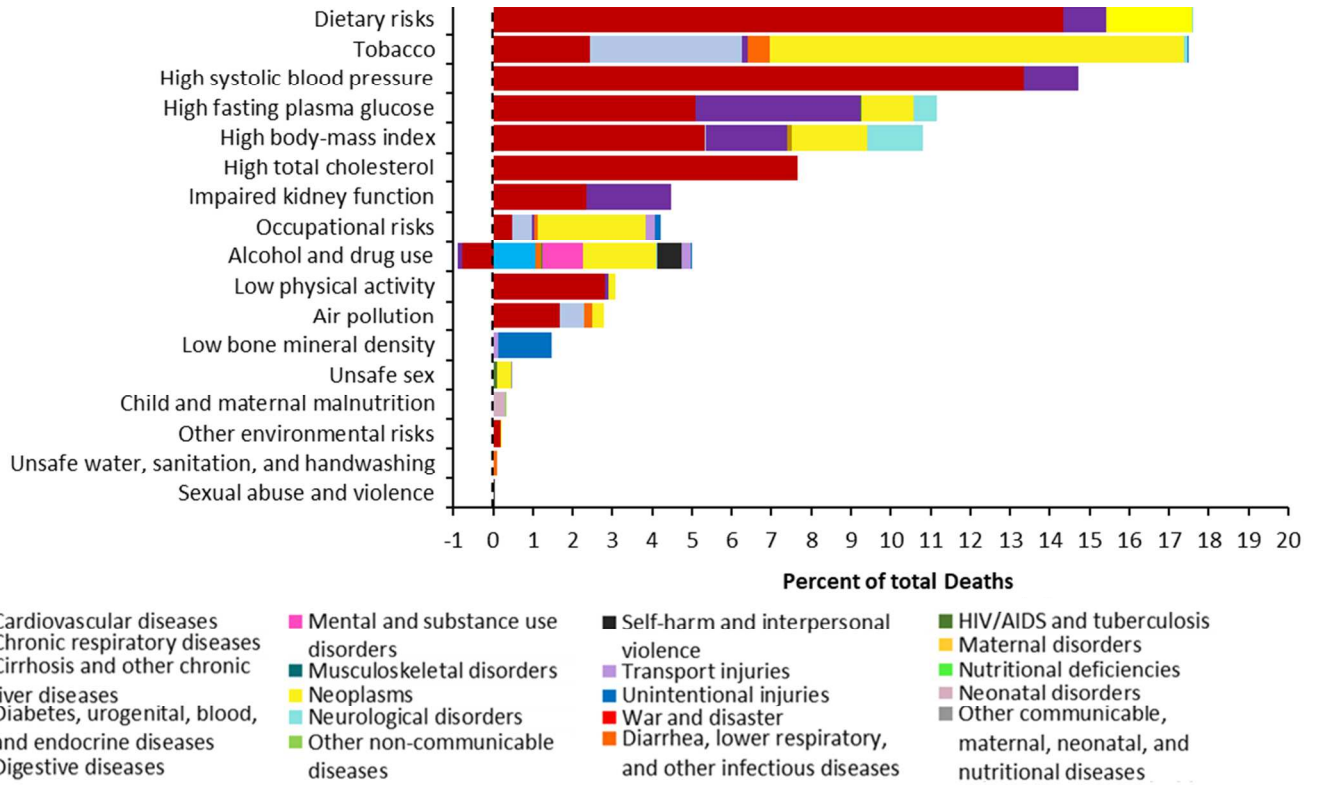

The negative percentage for alcohol is the protective effect of mild alcohol use on risk of cardiometabolic disease.

**Figure 3.** The burden of disease attributable to leading risk factors for Canadians in 2016 expressed as a percentage of years lived with disability (YLDs)

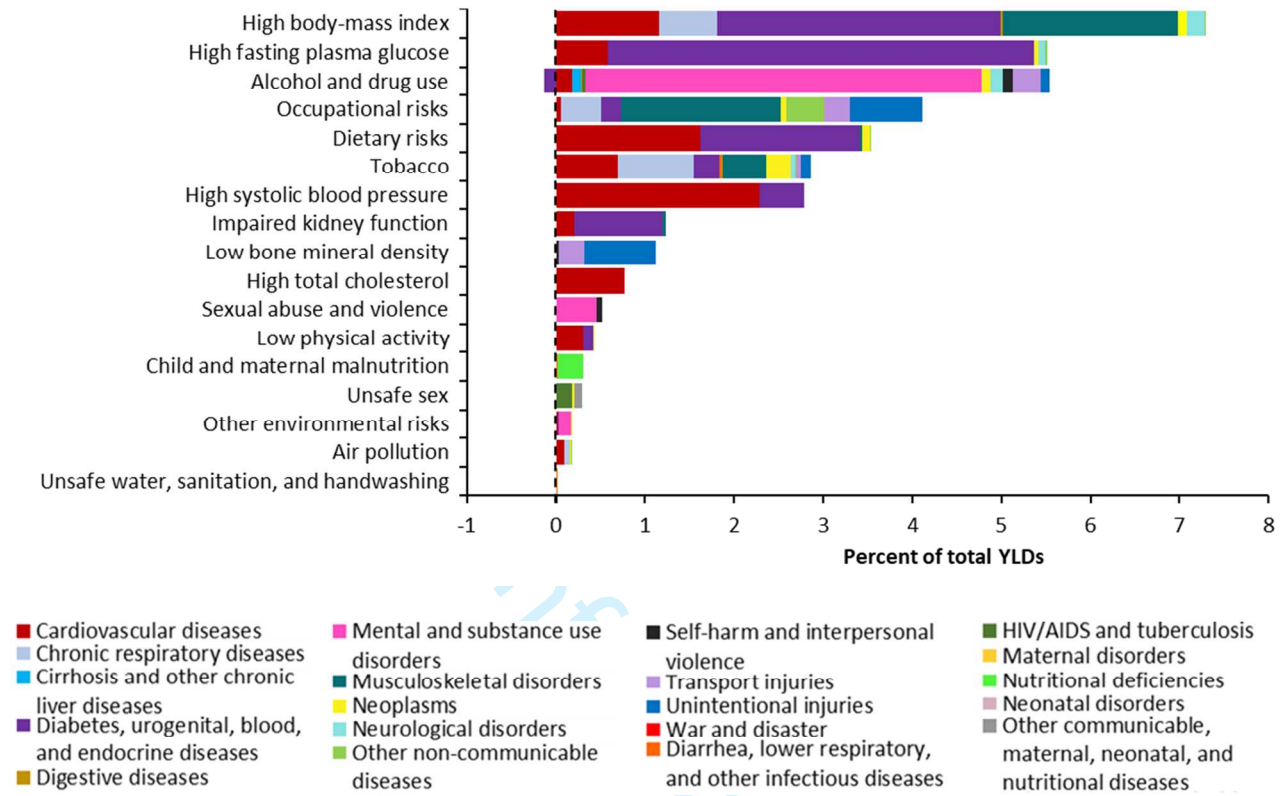

The negative percentage for alcohol is the protective effect of mild alcohol use on risk of cardiometabolic disease.

**Figure 4.** Rank changes in disability-adjusted life years (DALYs) attributable to leading risk factors and percent change in all-age and age-standardized DALY rates in Canada from 1990 to 2016

| Risk factors by attributable DALYs 1990       |                                               | Risk factors by attributable DALYs 2016       |                                               | % change all-age DALY rate (1990-2016) | % change age-standardised DALY rate (1990-2016) |
|-----------------------------------------------|-----------------------------------------------|-----------------------------------------------|-----------------------------------------------|----------------------------------------|-------------------------------------------------|
| 1. Tobacco                                    | 1. Tobacco                                    | 1. Tobacco                                    | 1. Tobacco                                    | -25.7%                                 | -47.4%                                          |
| 2. Dietary risks                              | 2. Dietary risks                              | 2. Dietary risks                              | 2. Dietary risks                              | -33.3%                                 | -53.2%                                          |
| 3. High systolic blood pressure               | 3. High body-mass index                       | 3. High body-mass index                       | 3. High body-mass index                       | 19.7%                                  | -12.2%                                          |
| 4. High body-mass index                       | 4. High fasting plasma glucose                | 4. High fasting plasma glucose                | 4. High fasting plasma glucose                | 1.67%                                  | -27.9%                                          |
| 5. High fasting plasma glucose                | 5. High systolic blood pressure               | 5. High systolic blood pressure               | 5. High systolic blood pressure               | -34.4%                                 | -55.3%                                          |
| 6. High total cholesterol                     | 6. Alcohol and drug use                       | 6. Alcohol and drug use                       | 6. Alcohol and drug use                       | 13.3%                                  | 8.53%                                           |
| 7. Alcohol and drug use                       | 7. Occupational risks                         | 7. Occupational risks                         | 7. Occupational risks                         | -4.0%                                  | -20.2%                                          |
| 8. Occupational risks                         | 8. High total cholesterol                     | 8. High total cholesterol                     | 8. High total cholesterol                     | -44.5%                                 | -62.1%                                          |
| 9. Impaired kidney function                   | 9. Impaired kidney function                   | 9. Impaired kidney function                   | 9. Impaired kidney function                   | -0.09%                                 | -31.3%                                          |
| 10. Air pollution                             | 10. Air pollution                             | 10. Air pollution                             | 10. Air pollution                             | -31.8%                                 | -52.3%                                          |
| 11. Low physical activity                     | 11. Low physical activity                     | 11. Low physical activity                     | 11. Low physical activity                     | -27.9%                                 | -51.7%                                          |
| 12. Child and maternal malnutrition           | 12. Child and maternal malnutrition           | 12. Child and maternal malnutrition           | 12. Child and maternal malnutrition           | -38.2%                                 | -20.2%                                          |
| 13. Unsafe sex                                | 13. Low bone mineral density                  | 13. Low bone mineral density                  | 13. Low bone mineral density                  | 44.8%                                  | -5.92%                                          |
| 14. Low bone mineral density                  | 14. Unsafe sex                                | 14. Unsafe sex                                | 14. Unsafe sex                                | -50.1%                                 | -54.9%                                          |
| 15. Sexual abuse and violence                 | 15. Sexual abuse and violence                 | 15. Sexual abuse and violence                 | 15. Sexual abuse and violence                 | -0.75%                                 | 1.59%                                           |
| 16. Other environmental risks                 | 16. Other environmental risks                 | 16. Other environmental risks                 | 16. Other environmental risks                 | -24.5%                                 | -39.9%                                          |
| 17. Unsafe water, sanitation, and handwashing | 17. Unsafe water, sanitation, and handwashing | 17. Unsafe water, sanitation, and handwashing | 17. Unsafe water, sanitation, and handwashing | 75.6%                                  | 33.9%                                           |

Behavioural risks   
  Metabolic risks   
  Environmental/occupational risks

One DALY is equivalent to one year of healthy life (free of disease, injury, or disability) that has been lost.



**Figure 5.** Rank changes of total deaths attributable to leading risk factors and percent change in all-age and age-standardized death rates in Canada between 1990 and 2016 for females and males combined

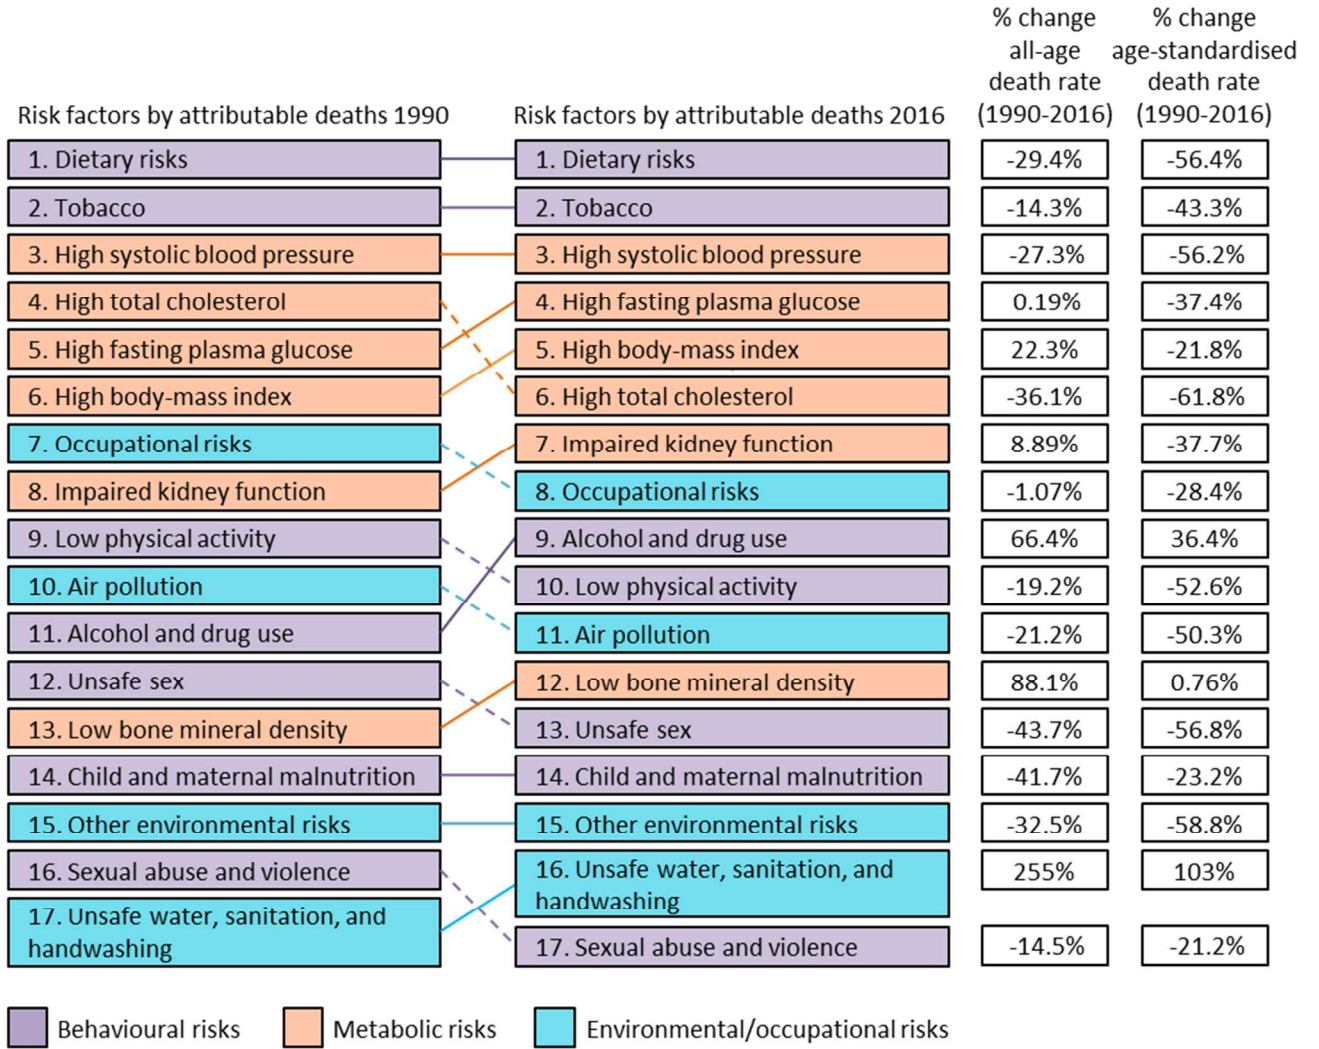

**Figure 6.** Rank changes of years lived with disability (YLDs) attributable to leading risk factors and percentage change in all-age and age-standardized YLD rates in Canada between 1990 and 2016 for females and males combined

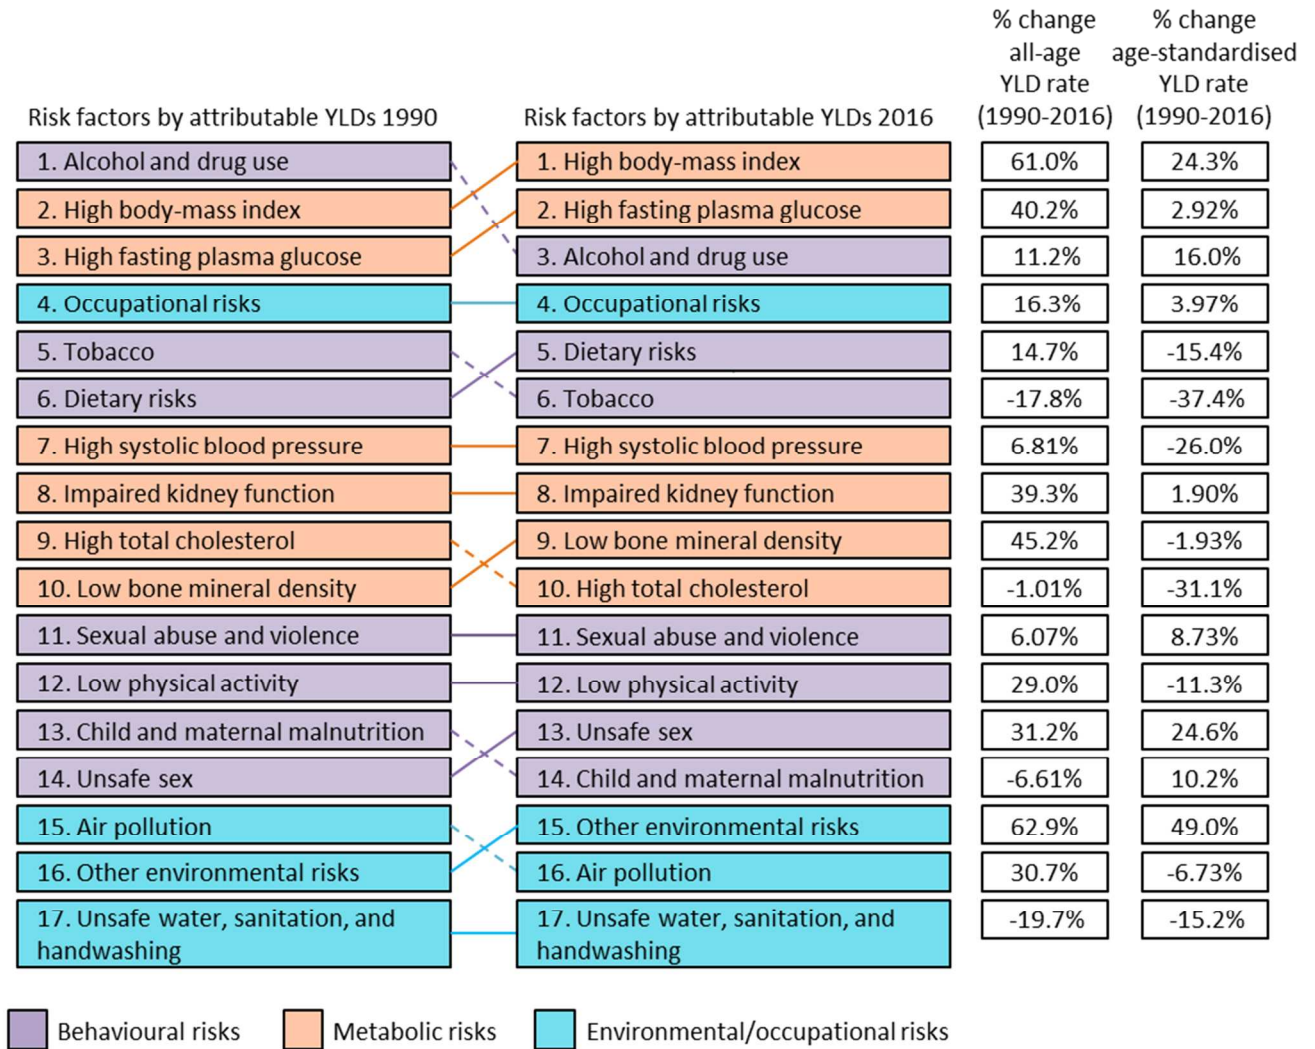



**Figure 7.** Drivers of percentage changes in Canada’s risk-attributable disease and injury burden from 2006 to 2016 due to population growth, population aging, risk-deleted mortality, and exposure to risk factors expressed as (A) disability-adjusted life years (DALYs) for all ages, (B) deaths for all ages, and (C) DALYs by age group

**A. DALYs, all ages**

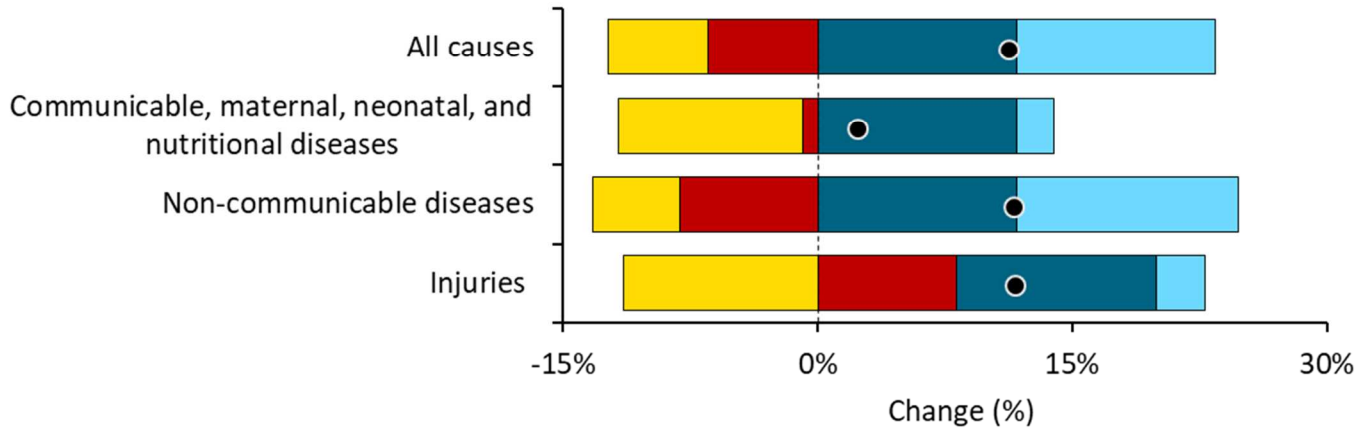

**B. deaths, all ages**

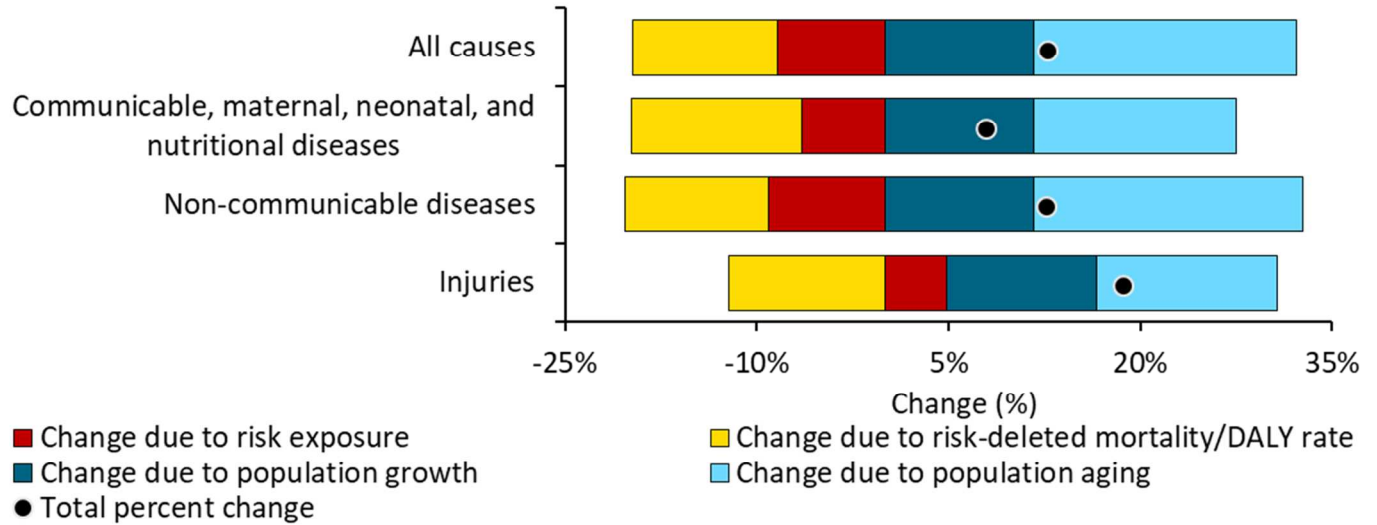

C. DALYs, by age group

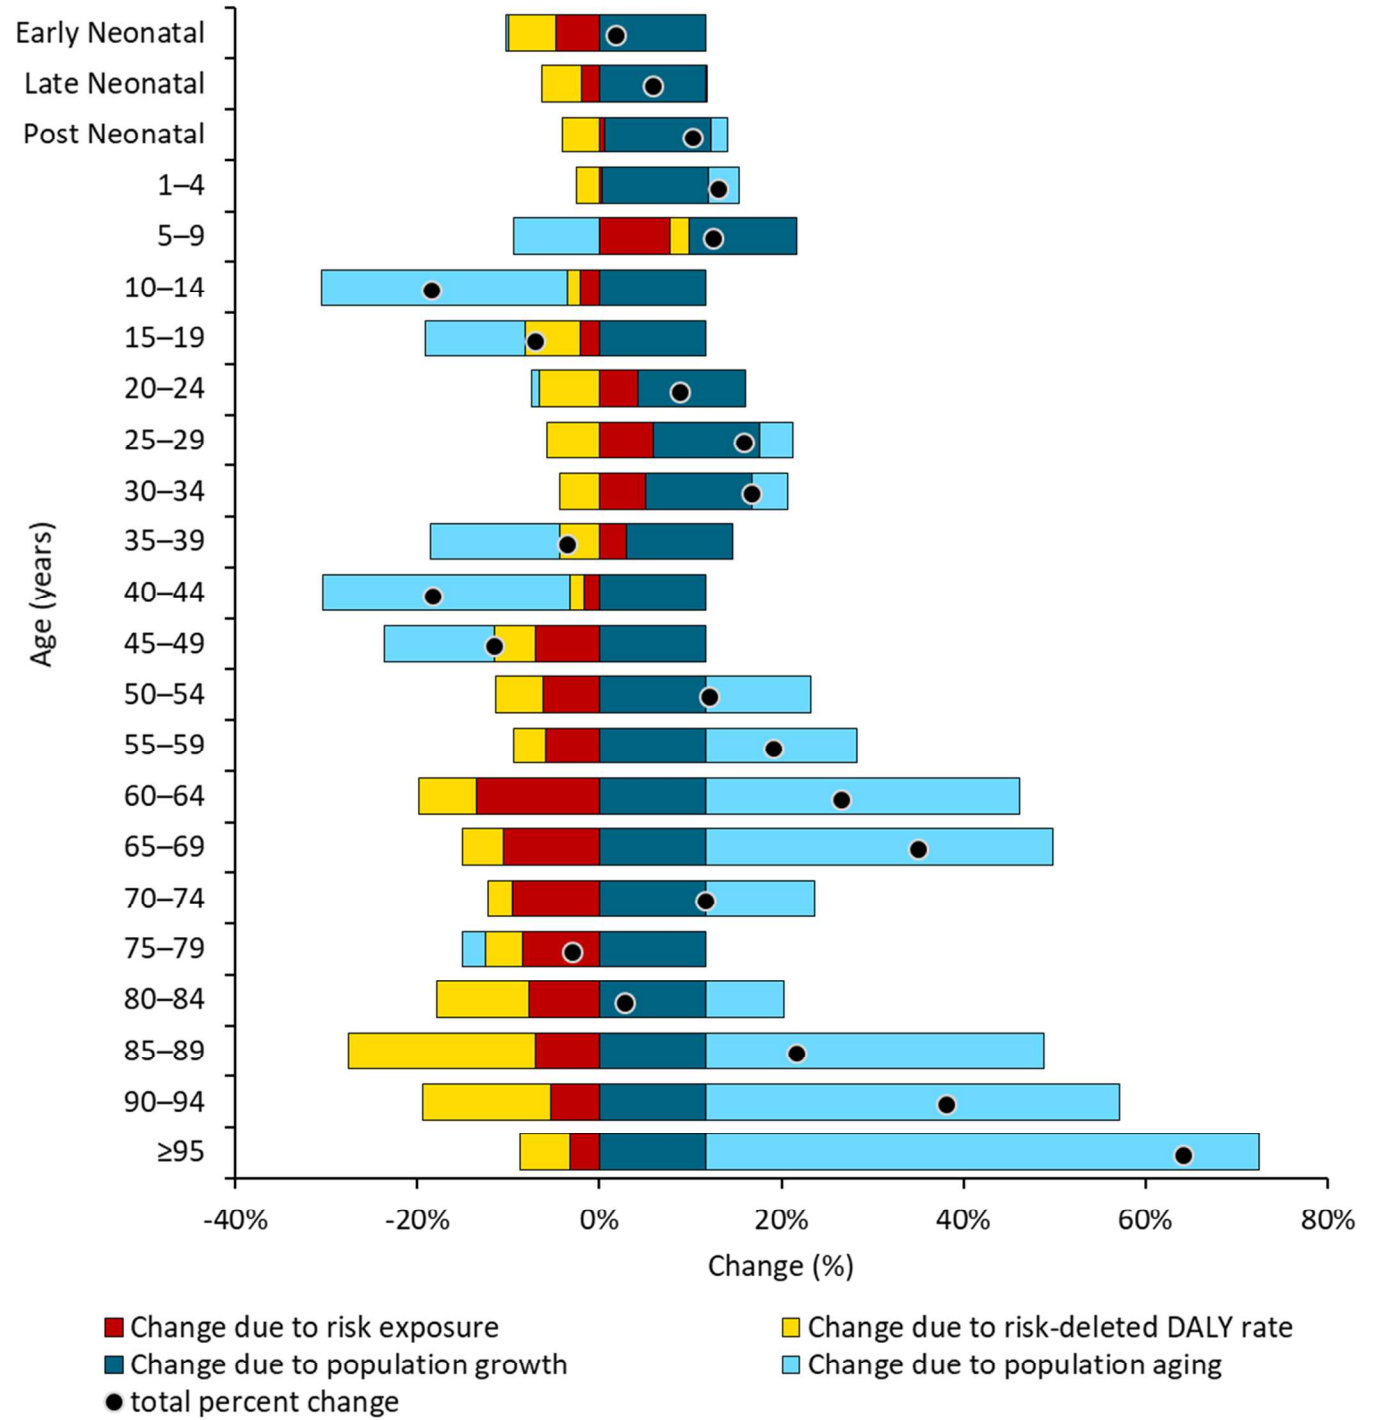

One DALY is equivalent to one year of healthy life (free of disease, injury, or disability) that has been lost.

**Supplementary Table 1.** Canadian dataset records used in the Global Burden of Disease Study 2016, organized by type of data

| <b>Data type</b>              | <b>Number of records</b> | <b>Examples of type of record</b>                                                                                                                                                                                                                                                                                                                                                                                                                                                                                                                                                          |
|-------------------------------|--------------------------|--------------------------------------------------------------------------------------------------------------------------------------------------------------------------------------------------------------------------------------------------------------------------------------------------------------------------------------------------------------------------------------------------------------------------------------------------------------------------------------------------------------------------------------------------------------------------------------------|
| <b>Administrative records</b> | 25                       | Canada Discharge Abstract Database 1994 to 2010<br>Canada National ambulatory care reporting system 2002–2010<br>The Canadian Neonatal Network Annual Report 2014                                                                                                                                                                                                                                                                                                                                                                                                                          |
| <b>Census</b>                 | 7                        | Canada Population Estimates 2012, 2014<br>Canada population and housing census 2011<br>Canada Census 1991, 2001                                                                                                                                                                                                                                                                                                                                                                                                                                                                            |
| <b>Disease registry</b>       | 163                      | Canada-BC/Alberta Congenital Anomalies Surveillance System Data<br>Canadian Organ Replacement Register Annual Statistics 2001–2017<br>Provincial cancer registry since 1991                                                                                                                                                                                                                                                                                                                                                                                                                |
| <b>Epi surveillance</b>       | 49                       | WHO Global Health Observatory Interactive Graph – Number of Cases of Cutaneous Leishmaniasis Reported 1998 to 2015<br>WHO Global Health Observatory Interactive Graph – Number of Cases of Visceral Leishmaniasis Reported 1998 to 2015<br>Zika cases – 2016<br>HIV in Canada: Surveillance Summary Tables, 2014–2015<br>Number of Reported Cases of Dengue and Severe Dengue (SD) in the Americas, by Country 2006 to 2014<br>Canada Reported Cases of Syphilis by Age and Sex<br>Canada Reported Cases of Gonorrhoea by Age and Sex<br>Canada Reported Cases of Chlamydia by Age and Sex |
| <b>Financial record</b>       | 16                       | Canada Rotary Committee for International Development Financial Statement 2006 to 2008<br>World University Service Canada Annual Report 2005 to 2007<br>Center for International Studies and Cooperation Annual Report 2000 to 2007                                                                                                                                                                                                                                                                                                                                                        |
| <b>Natural phenomena</b>      | 3                        | SPARTAN Global Particulate Matter Network Chemical Speciation Data<br>Canada National Air Pollution Surveillance Network PM <sub>2.5</sub> Data 2013<br>Canada Air Quality Annual PM <sub>2.5</sub> and PM <sub>10</sub> Data 1990, 1995, 2000, 2005, 2010, 2012                                                                                                                                                                                                                                                                                                                           |
| <b>Other publications</b>     | 2                        | Operation Iraqi Freedom – Iraq Coalition Casualties: Fatalities By Year                                                                                                                                                                                                                                                                                                                                                                                                                                                                                                                    |

|                              |     |                                                                                                                                                                                                                                                                                                                                                                                                                                                                                                                                                                                                                                                                                                                                                                                                                                                                                                              |
|------------------------------|-----|--------------------------------------------------------------------------------------------------------------------------------------------------------------------------------------------------------------------------------------------------------------------------------------------------------------------------------------------------------------------------------------------------------------------------------------------------------------------------------------------------------------------------------------------------------------------------------------------------------------------------------------------------------------------------------------------------------------------------------------------------------------------------------------------------------------------------------------------------------------------------------------------------------------|
|                              |     | Operation Enduring Freedom – Coalition Deaths by Year                                                                                                                                                                                                                                                                                                                                                                                                                                                                                                                                                                                                                                                                                                                                                                                                                                                        |
| <b>Report</b>                | 28  | Canada UNGASS Country Progress Report 2012<br>Social Determinants of Health and Well-being Among Young People: Health Behaviour in School-aged Children (HBSC) Study: International Report from the 2001–2, 2005–6, 2009–10 Survey<br>Canadian Neonatal Network Annual Report 2005, 2009<br>Canada Evaluation of Progress in Drug Control 2005–2006<br>Canada Community Health Survey Findings – Adult Obesity in Canada: Measured Height and Weight 2004<br>Canada: Alcohol and Partner Physical Aggression in the 10 Provinces<br>Violence Against Women: An International Perspective<br>Canada – Trends in Breastfeeding Practices in Canada (2001 to 2009–2010)<br>Canadian National Report on Immunization 2006<br>Canada – Homicide in Canada, 2001 to 2010<br>World Taxation and Price Guide 1994<br>OECD Regions at a Glance 2011<br>Canada – Family Violence in Canada: A Statistical Profile 2007 |
| <b>Scientific literature</b> | 403 | A 2015 global update on folic acid-preventable spina bifida and anencephaly<br>Income adequacy and education associated with the prevalence of obesity in rural Saskatchewan, Canada<br>A preliminary investigation into diet adequacy in senior residents of Newfoundland and Labrador, Canada: a cross-sectional study<br>Prevalence of Hearing Loss Among a Representative Sample of Canadian Children and Adolescents, 3 to 19 Years of Age                                                                                                                                                                                                                                                                                                                                                                                                                                                              |
| <b>Surveys</b>               | 117 | Canada Tobacco Use Monitoring Survey 2012<br>Canada Health Measures Survey 2012–2013<br>Canada Community Health Survey – Mental Health 2012 Major Depressive Disorder and Bipolar Disorder Tabulations<br>Canada Childhood National Immunization Coverage Survey 2011<br>Canada Alcohol and Drug Use Monitoring Survey 2011<br>Canada Progress in International Reading Literacy Study 2010–2011<br>Canada Program for International Student Assessment 2015                                                                                                                                                                                                                                                                                                                                                                                                                                                 |
| <b>Vital registrations</b>   | 45  | Canada Vital Registration – Deaths 1990 to 2012                                                                                                                                                                                                                                                                                                                                                                                                                                                                                                                                                                                                                                                                                                                                                                                                                                                              |

*Supplementary tables & figures*

|              |                                                                                                                                                                                                                                |
|--------------|--------------------------------------------------------------------------------------------------------------------------------------------------------------------------------------------------------------------------------|
|              | Canada Vital Registration Late Fetal Death Data 1997 to 2011<br>Canada CANSIM Database – Live Births, by Weeks of Gestation and Sex, Canada,<br>Provinces and Territories, Annual<br>Canada Vital Registration Birth Data 1990 |
| <b>TOTAL</b> | 868                                                                                                                                                                                                                            |

Confidential

**Supplementary Table 2.** Included risk factors (levels 0-2, GBD Canada 1900–c2016)

| Level 0                  | Level 1                          | Level 2                                   |
|--------------------------|----------------------------------|-------------------------------------------|
| All risk factors         | Behavioural risks                | Alcohol and drug use                      |
|                          |                                  | Dietary risks                             |
|                          |                                  | Low physical activity                     |
|                          |                                  | Malnutrition                              |
|                          |                                  | Sexual abuse and violence                 |
|                          |                                  | Tobacco                                   |
|                          |                                  | Unsafe sex                                |
|                          |                                  |                                           |
|                          | Environmental/occupational risks | Air pollution                             |
|                          |                                  | Occupational risks                        |
|                          |                                  | Other environmental risks                 |
|                          |                                  | Unsafe water, sanitation, and handwashing |
|                          |                                  |                                           |
|                          | Metabolic risks                  | High body-mass index (BMI)                |
|                          |                                  | High fasting plasma glucose (FPG)         |
|                          |                                  | High systolic blood pressure (SBP)        |
|                          |                                  | High total cholesterol                    |
|                          |                                  | Impaired kidney function                  |
| Low bone mineral density |                                  |                                           |

**Supplementary Figure 1.** Burden of disease attributable to leading risk factors for Canadians in 2016, expressed as a percentage of total disability-adjusted life years (DALYs) for (A) females (B) males.

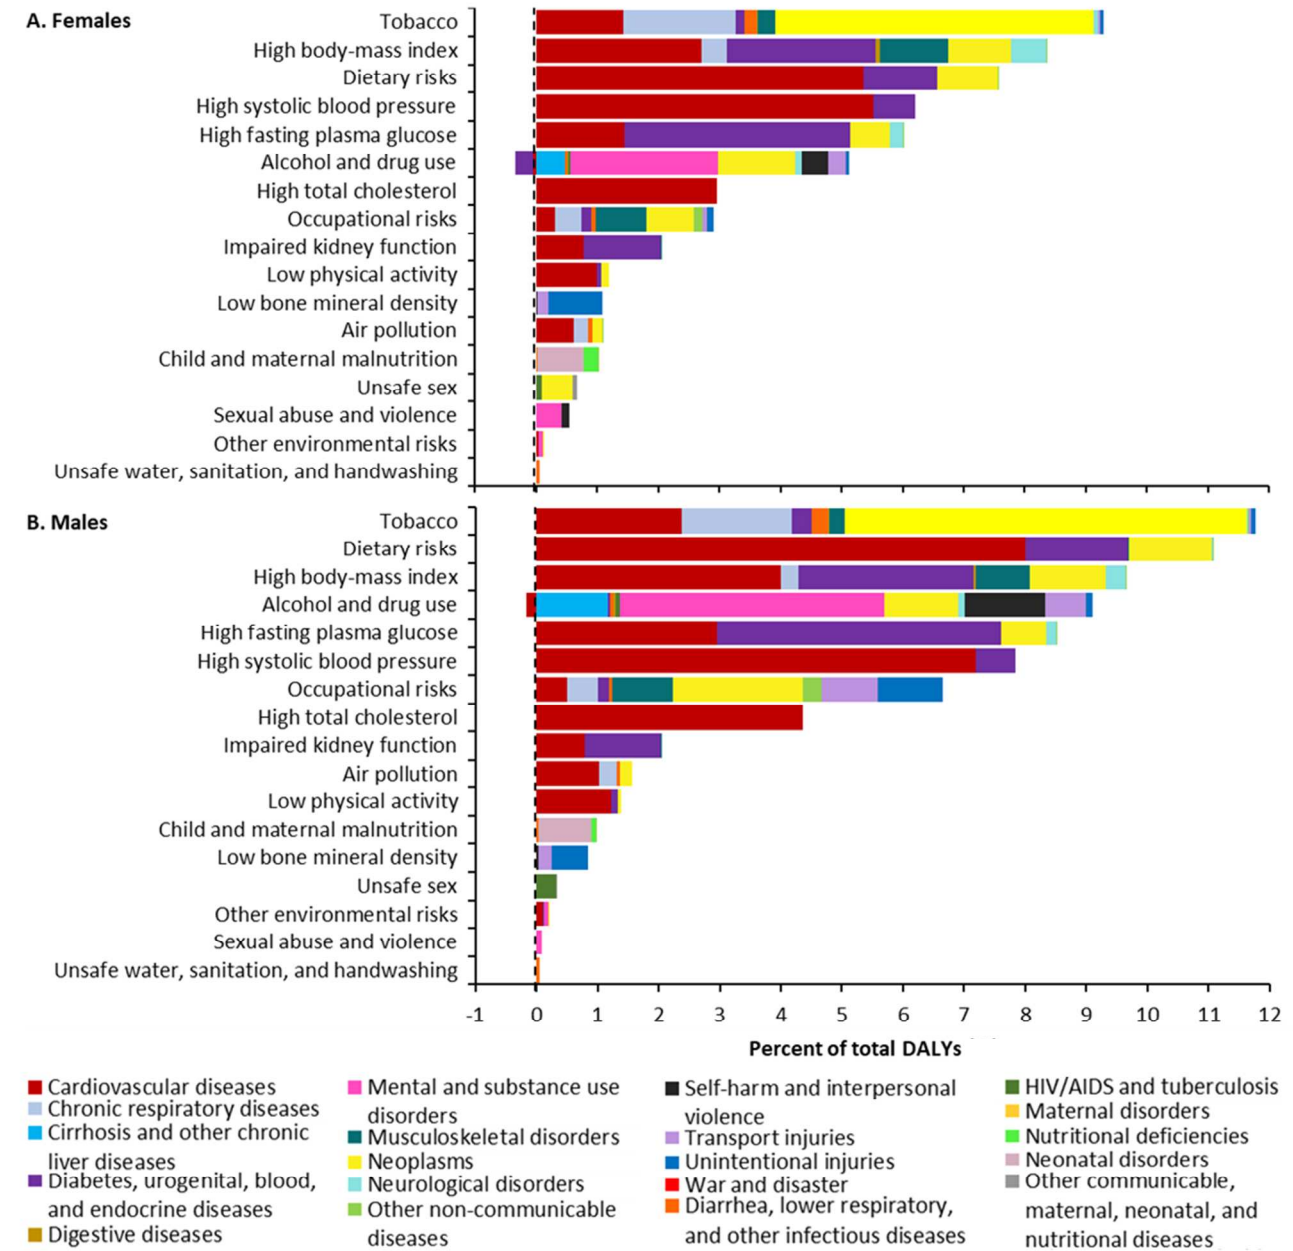

One DALY is equivalent to one year of healthy life (free of disease, injury, or disability) that has been lost. The negative percentage for alcohol is the protective effect of mild alcohol use on risk of cardiometabolic disease.

**Supplementary Figure 2.** The burden of disease attributable to leading risk factors for Canadians in 2016, expressed as a percentage of total deaths for (A) females (B) males

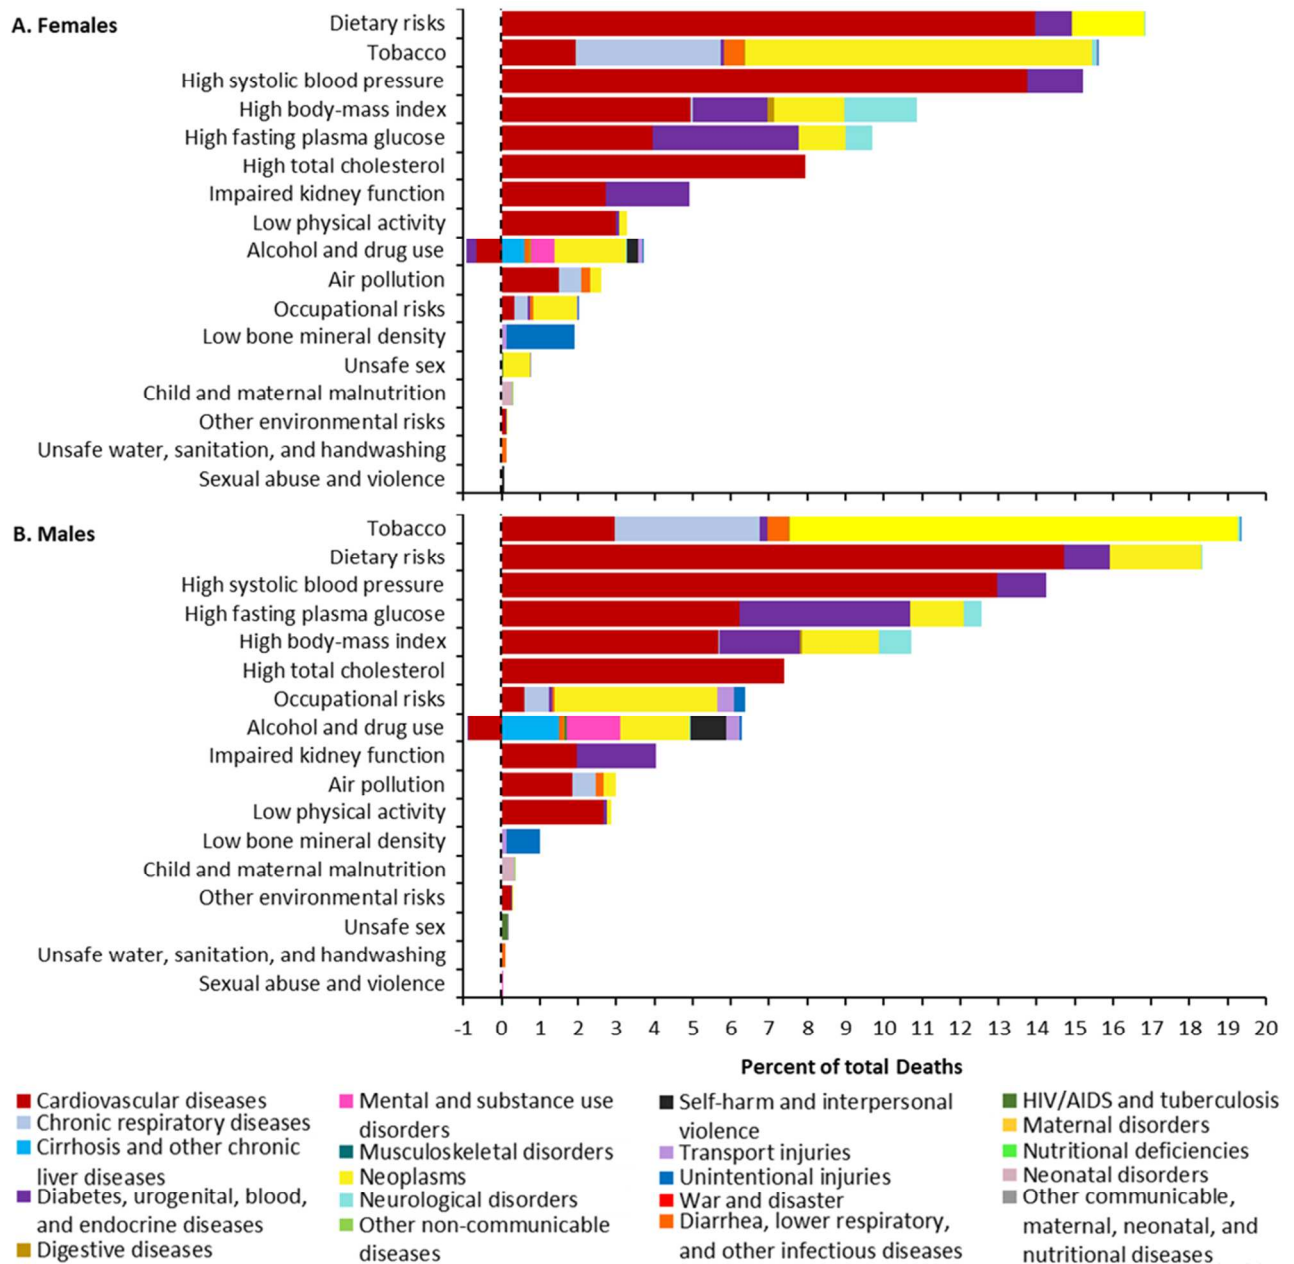

The negative percentage for alcohol is the protective effect of mild alcohol use on risk of cardiometabolic disease.



**Supplementary Figure 3.** The burden of disease attributable to leading risk factors for Canadians in 2016, expressed as a percentage of years lived with disability (YLDs) for (A) females (B) males

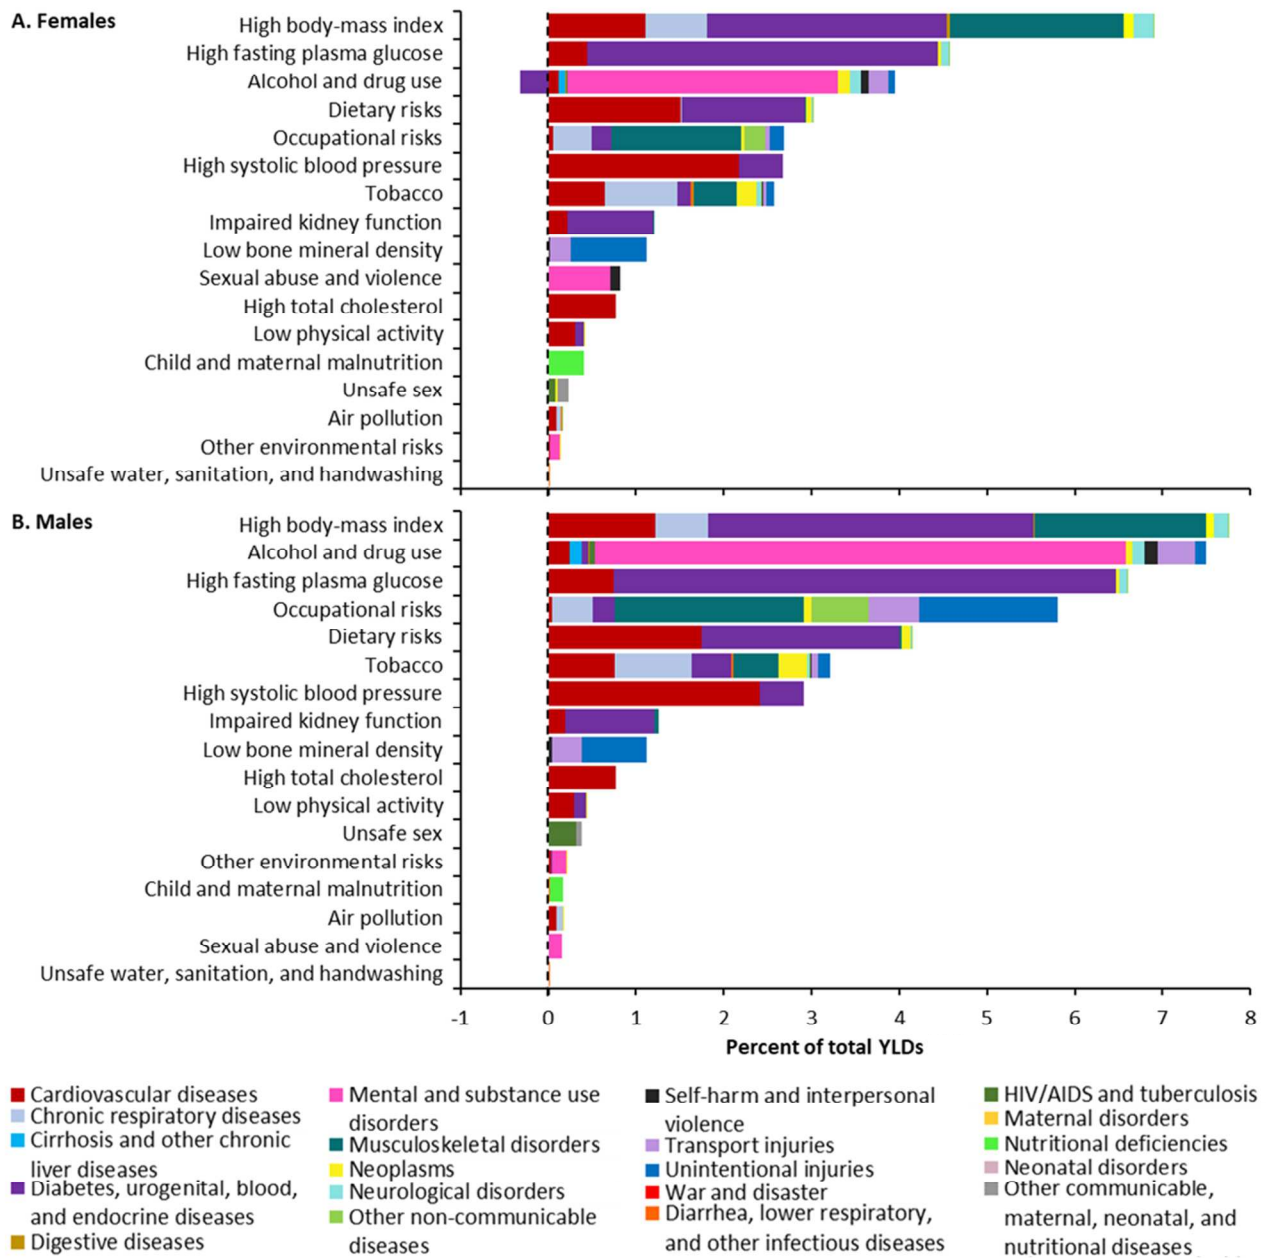

The negative percentage for alcohol is the protective effect of mild alcohol use on risk of cardiometabolic disease.

**Supplementary Figure 4.** Rank changes in disability-adjusted life years (DALYs) attributable to leading risk factors and percent change in all-age and age-standardized DALY rates in Canada between 1990 and 2016, for (A) women and (B) men

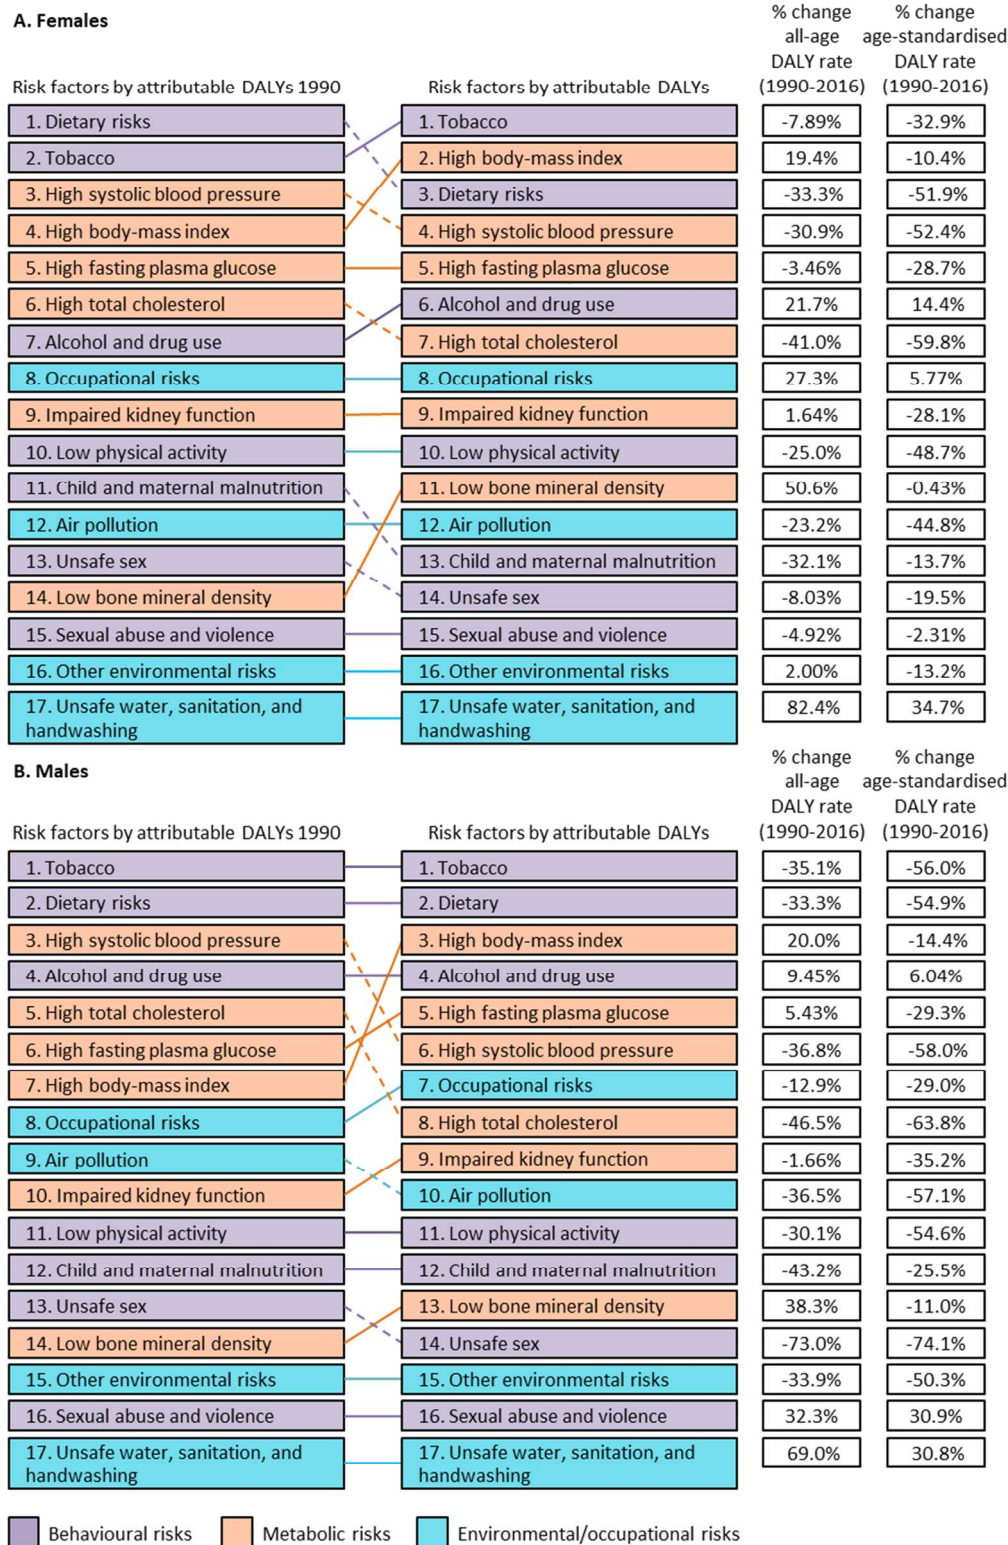

**Supplementary Figure 5.** Rank changes in total deaths attributable to leading risk factors and percent change in all-age and age-standardized death rates in Canada between 1990 and 2016, for (A) women and (B) men

**A. Females**

| Risk factors by attributable deaths 1990      | Risk factors by attributable deaths           | % change all-age death rate (1990-2016) | % change age-standardised death rate (1990-2016) |
|-----------------------------------------------|-----------------------------------------------|-----------------------------------------|--------------------------------------------------|
| 1. Dietary risks                              | 1. Dietary risks                              | -27.7%                                  | -56.3%                                           |
| 2. High systolic blood pressure               | 2. Tobacco                                    | 12.3%                                   | -24.4%                                           |
| 3. Tobacco                                    | 3. High systolic blood pressure               | -22.3%                                  | -54.3%                                           |
| 4. High total cholesterol                     | 4. High body-mass index                       | 26.9%                                   | -20.8%                                           |
| 5. High fasting plasma glucose                | 5. High fasting plasma glucose                | -3.47%                                  | -40.0%                                           |
| 6. High body-mass index                       | 6. High total cholesterol                     | -30.8%                                  | -60.1%                                           |
| 7. Impaired kidney function                   | 7. Impaired kidney function                   | 11.9%                                   | -36.6%                                           |
| 8. Low physical activity                      | 8. Low physical activity                      | -15.0%                                  | -51.2%                                           |
| 9. Air pollution                              | 9. Alcohol and drug use                       | 120%                                    | 56.3%                                            |
| 10. Occupational risks                        | 10. Air pollution                             | -11.1%                                  | -43.9%                                           |
| 11. Alcohol and drug use                      | 11. Occupational risks                        | 34.6%                                   | -0.78%                                           |
| 12. Low bone mineral density                  | 12. Low bone mineral density                  | 91.4%                                   | 3.33%                                            |
| 13. Unsafe sex                                | 13. Unsafe sex                                | -2.51%                                  | -27.1%                                           |
| 14. Child and maternal malnutrition           | 14. Child and maternal malnutrition           | -37.5%                                  | -17.6%                                           |
| 15. Other environmental risks                 | 15. Other environmental risks                 | -17.5%                                  | -51.0%                                           |
| 16. Sexual abuse and violence                 | 16. Unsafe water, sanitation, and handwashing | 292%                                    | 126%                                             |
| 17. Unsafe water, sanitation, and handwashing | 17. Sexual abuse and violence                 | -26.1%                                  | -28.5%                                           |

**B. Males**

| Risk factors by attributable deaths 1990      | Risk factors by attributable deaths           | % change all-age death rate (1990-2016) | % change age-standardised death rate (1990-2016) |
|-----------------------------------------------|-----------------------------------------------|-----------------------------------------|--------------------------------------------------|
| 1. Tobacco                                    | 1. Tobacco                                    | -27.8%                                  | -54.1%                                           |
| 2. Dietary risks                              | 2. Dietary risks                              | -30.8%                                  | -57.4%                                           |
| 3. High systolic blood pressure               | 3. High systolic blood pressure               | -31.8%                                  | -58.4%                                           |
| 4. High total cholesterol                     | 4. High fasting plasma glucose                | 3.16%                                   | -37.2%                                           |
| 5. High fasting plasma glucose                | 5. High body-mass index                       | 18.0%                                   | -24.0%                                           |
| 6. High body-mass index                       | 6. High total cholesterol                     | -41.0%                                  | -63.7%                                           |
| 7. Occupational risks                         | 7. Occupational risks                         | -8.63%                                  | -36.9%                                           |
| 8. Air pollution                              | 8. Alcohol and drug use                       | 48.0%                                   | 30.4%                                            |
| 9. Impaired kidney function                   | 9. Impaired kidney function                   | 5.55%                                   | -39.6%                                           |
| 10. Low physical activity                     | 10. Air pollution                             | -28.2%                                  | -55.3%                                           |
| 11. Alcohol and drug use                      | 11. Low physical activity                     | -23.4%                                  | -54.6%                                           |
| 12. Unsafe sex                                | 12. Low bone mineral density                  | 82.3%                                   | -1.89%                                           |
| 13. Child and maternal malnutrition           | 13. Child and maternal malnutrition           | -44.8%                                  | -27.3%                                           |
| 14. Low bone mineral density                  | 14. Other environmental risks                 | -38.1%                                  | -61.4%                                           |
| 15. Other environmental risks                 | 15. Unsafe sex                                | -81.9%                                  | -83.4%                                           |
| 16. Unsafe water, sanitation, and handwashing | 16. Unsafe water, sanitation, and handwashing | 216%                                    | 76.8%                                            |
| 17. Sexual abuse and violence                 | 17. Sexual abuse and violence                 | 66.8%                                   | 23.8%                                            |

Behavioural risks
  Metabolic risks
  Environmental/occupational risks



**Supplementary Figure 6.** Rank changes in years lived with disability (YLDs) attributable to leading risk factors and percent change in all-age and age-standardized YLD rates in Canada between 1990 and 2016 for (A) females (B) males

**Supplementary Figure 7.** The burden of disease attributable to leading risk factors in 2016 for Canadians, expressed as a percentage of

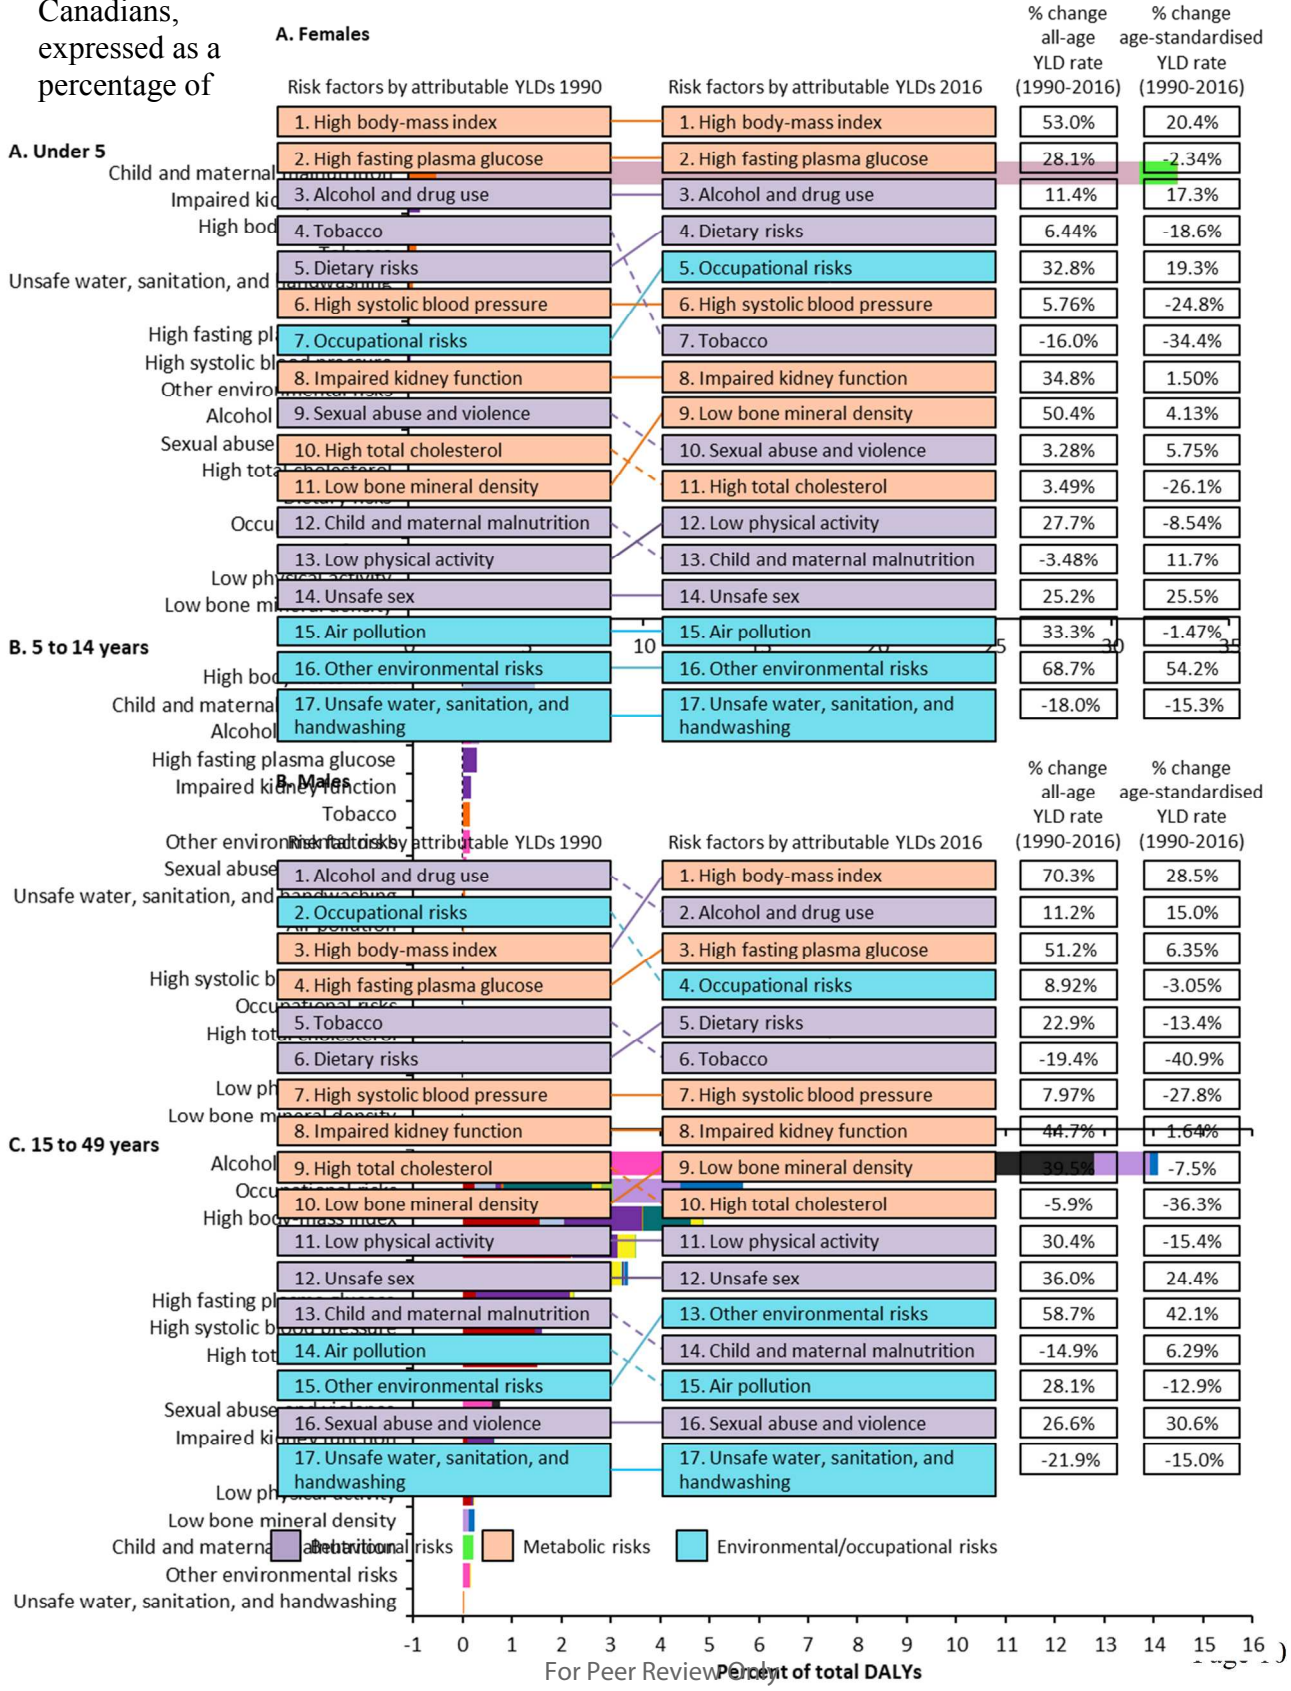

For Peer Review Percent of total DALYs

total disability-adjusted life years (DALYs) stratified by age group

**E. 50 to 69 years**

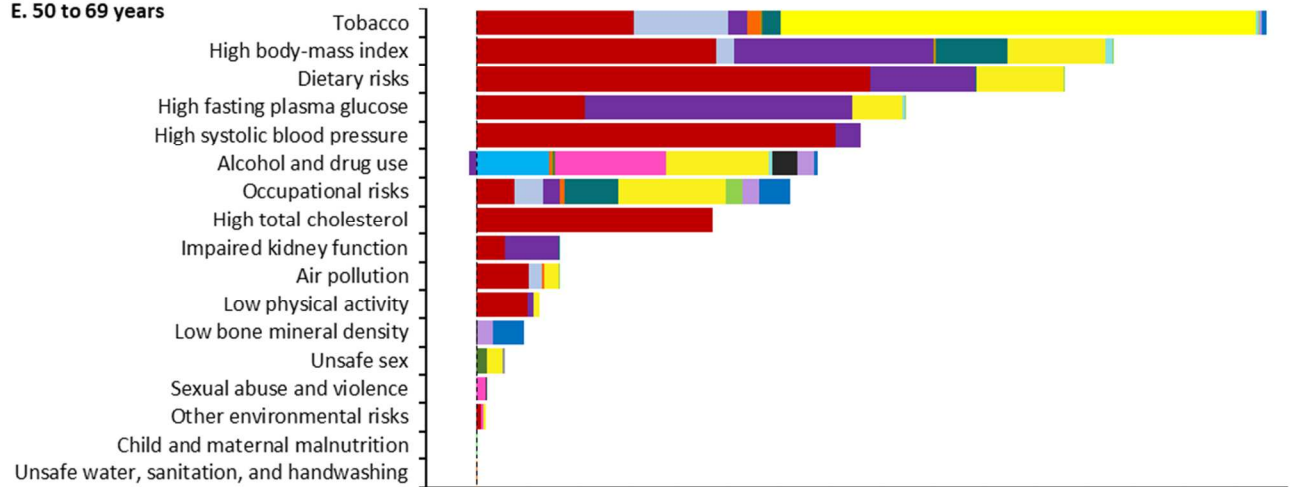

**F. 70+ years**

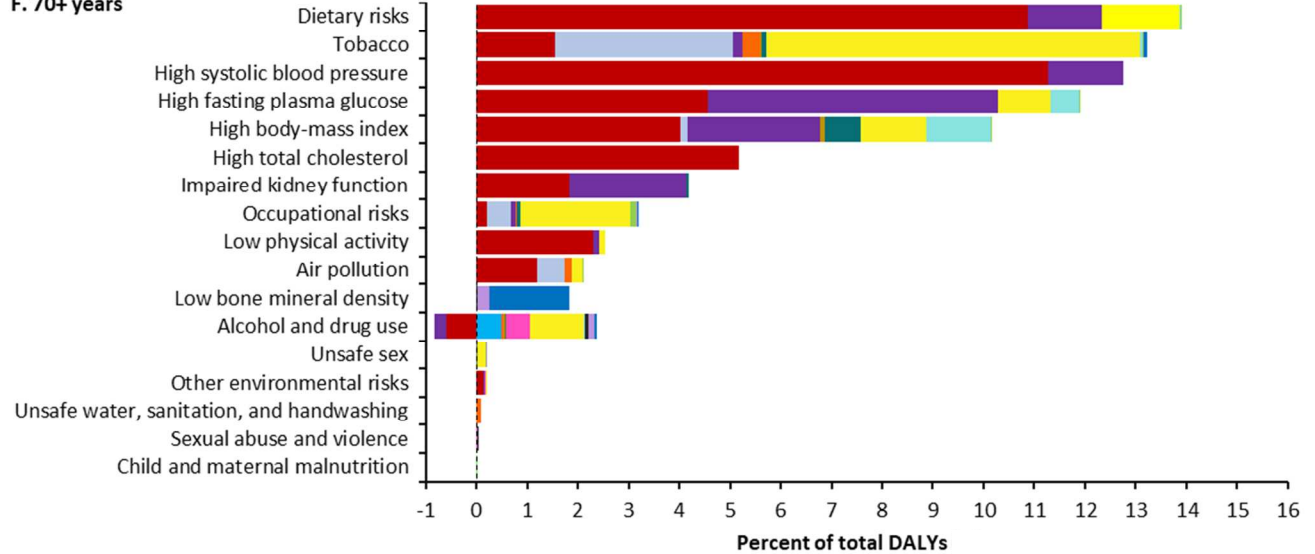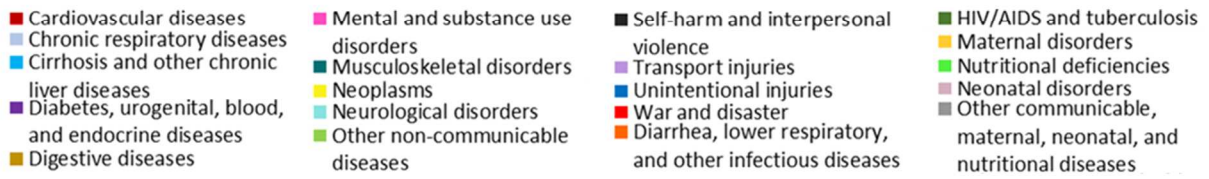

**Supplementary Figure 8.** Rank changes of disability-adjusted life years (DALYs) attributable to leading risk factors and percent change in DALY rates and number of DALYs in Canada between 1990 and 2016, in age categories

**A. Under 5**

| Risk factors by attributable DALYs 1990      | Risk factors by attributable DALYs 2016      | % change DALY rate (1990-2016) | % change in number of DALYs (1990-2016) |
|----------------------------------------------|----------------------------------------------|--------------------------------|-----------------------------------------|
| 1. Child and maternal malnutrition           | 1. Child and maternal malnutrition           | -24.2                          | -22.2                                   |
| 2. Tobacco                                   | 2. Impaired kidney function                  | 39.9                           | 43.5                                    |
| 3. Impaired kidney function                  | 3. High body-mass index                      | 28.8                           | 32.1                                    |
| 4. High body-mass index                      | 4. Tobacco                                   | -54.9                          | -53.7                                   |
| 5. Air pollution                             | 5. Unsafe water, sanitation, and handwashing | 8.30                           | 11.1                                    |
| 6. Unsafe water, sanitation, and handwashing | 6. Air pollution                             | -57.0                          | -55.9                                   |
| 7. High fasting plasma glucose               | 7. High fasting plasma glucose               | -37.8                          | -36.1                                   |
| 8. High systolic blood pressure              | 8. High systolic blood pressure              | -2.43                          | 0                                       |
| 9. Other environmental risks                 | 9. Other environmental risks                 | 140                            | 146                                     |
| 10. Alcohol and drug use                     | 10. Alcohol and drug use                     | 59.1                           | 63.2                                    |
| 11. Sexual abuse and violence                | 11. Sexual abuse and violence                | 18.29                          | 21.2                                    |

**B. 5-14 years**

| Risk factors by attributable DALYs 1990      | Risk factors by attributable DALYs 2016      | % change DALY rate (1990-2016) | % change in number of DALYs (1990-2016) |
|----------------------------------------------|----------------------------------------------|--------------------------------|-----------------------------------------|
| 1. High body-mass index                      | 1. High body-mass index                      | 16.6                           | 11.6                                    |
| 2. Child and maternal malnutrition           | 2. Child and maternal malnutrition           | 14.0                           | 9.20                                    |
| 3. Alcohol and drug use                      | 3. Alcohol and drug use                      | -9.04                          | -12.9                                   |
| 4. High fasting plasma glucose               | 4. High fasting plasma glucose               | -12.7                          | -16.4                                   |
| 5. Tobacco                                   | 5. Impaired kidney function                  | -18.2                          | -21.7                                   |
| 6. Impaired kidney function                  | 6. Tobacco                                   | -43.9                          | -46.3                                   |
| 7. Other environmental risks                 | 7. Other environmental risks                 | -8.50                          | -12.4                                   |
| 8. Unsafe water, sanitation, and handwashing | 8. Sexual abuse and violence                 | 17.6                           | 12.7                                    |
| 9. Sexual abuse and violence                 | 9. Unsafe water, sanitation, and handwashing | -16.1                          | -19.7                                   |
| 10. Air pollution                            | 10. Air pollution                            | -56.2                          | -58.0                                   |
| 11. Unsafe sex                               | 11. Unsafe sex                               | -50.8                          | -52.9                                   |
| 12. High systolic blood pressure             | 12. High systolic blood pressure             | -13.6                          | -17.2                                   |
| 13. Occupational risks                       | 13. Occupational risks                       | -3.36                          | -7.44                                   |

Behavioural risks
  Metabolic risks
  Environmental/occupational risks



## Supplementary tables &amp; figures

## C. 15-49 years

| Risk factors by attributable DALYs 1990       | Risk factors by attributable DALYs 2016       | % change DALY rate (1990-2016) | % change in number of DALYs (1990-2016) |
|-----------------------------------------------|-----------------------------------------------|--------------------------------|-----------------------------------------|
| 1. Alcohol and drug use                       | 1. Alcohol and drug use                       | 1.14                           | 13.9                                    |
| 2. Occupational risks                         | 2. Occupational risks                         | -15.7                          | -5.09                                   |
| 3. Tobacco                                    | 3. High body-mass index                       | 1.55                           | 14.3                                    |
| 4. Dietary risks                              | 4. Dietary risks                              | -36.4                          | -28.4                                   |
| 5. High body-mass index                       | 5. Tobacco                                    | -49.4                          | -43.1                                   |
| 6. High total cholesterol                     | 6. High fasting plasma glucose                | 0.60                           | 13.3                                    |
| 7. High systolic blood pressure               | 7. High systolic blood pressure               | -42.7                          | -35.5                                   |
| 8. Unsafe sex                                 | 8. High total cholesterol                     | -46.7                          | -40.0                                   |
| 9. High fasting plasma glucose                | 9. Unsafe sex                                 | -64.2                          | -59.7                                   |
| 10. Sexual abuse and violence                 | 10. Sexual abuse and violence                 | 1.58                           | 14.4                                    |
| 11. Air pollution                             | 11. Impaired kidney function                  | -7.94                          | 3.65                                    |
| 12. Impaired kidney function                  | 12. Air pollution                             | -44.9                          | -38.0                                   |
| 13. Low physical activity                     | 13. Low physical activity                     | -33.3                          | -24.9                                   |
| 14. Low bone mineral density                  | 14. Low bone mineral density                  | -1.12                          | 11.3                                    |
| 15. Child and maternal malnutrition           | 15. Child and maternal malnutrition           | 6.94                           | 20.4                                    |
| 16. Other environmental risks                 | 16. Other environmental risks                 | 17.7                           | 32.5                                    |
| 17. Unsafe water, sanitation, and handwashing | 17. Unsafe water, sanitation, and handwashing | -1.83                          | 10.5                                    |

## D. 50-69 years

| Risk factors by attributable DALYs 1990       | Risk factors by attributable DALYs 2016       | % change DALY rate (1990-2016) | % change in number of DALYs (1990-2016) |
|-----------------------------------------------|-----------------------------------------------|--------------------------------|-----------------------------------------|
| 1. Tobacco                                    | 1. Tobacco                                    | -52.3                          | -1.10                                   |
| 2. Dietary risks                              | 2. High body-mass index                       | -20.4                          | 64.8                                    |
| 3. High systolic blood pressure               | 3. Dietary risks                              | -56.4                          | -9.71                                   |
| 4. High body-mass index                       | 4. High fasting plasma glucose                | -31.7                          | 41.5                                    |
| 5. High total cholesterol                     | 5. High systolic blood pressure               | -60.0                          | -17.1                                   |
| 6. High fasting plasma glucose                | 6. Alcohol and drug use                       | 10.5                           | 129                                     |
| 7. Occupational risks                         | 7. Occupational risks                         | -26.2                          | 53.0                                    |
| 8. Alcohol and drug use                       | 8. High total cholesterol                     | -65.8                          | -29.1                                   |
| 9. Air pollution                              | 9. Impaired kidney function                   | -37.4                          | 29.8                                    |
| 10. Low physical activity                     | 10. Air pollution                             | -57.4                          | -11.7                                   |
| 11. Impaired kidney function                  | 11. Low physical activity                     | -56.4                          | -9.67                                   |
| 12. Low bone mineral density                  | 12. Low bone mineral density                  | -13.9                          | 78.4                                    |
| 13. Unsafe sex                                | 13. Unsafe sex                                | -26.4                          | 52.5                                    |
| 14. Other environmental risks                 | 14. Sexual abuse and violence                 | -0.43                          | 106                                     |
| 15. Sexual abuse and violence                 | 15. Other environmental risks                 | -59.8                          | -16.8                                   |
| 16. Unsafe water, sanitation, and handwashing | 16. Child and maternal malnutrition           | 80.4                           | 274                                     |
| 17. Child and maternal malnutrition           | 17. Unsafe water, sanitation, and handwashing | 41.2                           | 193                                     |

Behavioural risks
  Metabolic risks
  Environmental/occupational risks

## E. 70+ years

| Risk factors by attributable DALYs 1990       | Risk factors by attributable DALYs 2016       | % change DALY rate (1990-2016) | % change in number of DALYs (1990-2016) |
|-----------------------------------------------|-----------------------------------------------|--------------------------------|-----------------------------------------|
| 1. Dietary risks                              | 1. Dietary risks                              | -52.0                          | -9.96                                   |
| 2. High systolic blood pressure               | 2. Tobacco                                    | -38.0                          | 16.2                                    |
| 3. Tobacco                                    | 3. High systolic blood pressure               | -50.6                          | -7.35                                   |
| 4. High fasting plasma glucose                | 4. High fasting plasma glucose                | -29.5                          | 32.2                                    |
| 5. High total cholesterol                     | 5. High body-mass index                       | -5.35                          | 77.4                                    |
| 6. High body-mass index                       | 6. High total cholesterol                     | -57.1                          | -19.6                                   |
| 7. Impaired kidney function                   | 7. Impaired kidney function                   | -26.6                          | 37.6                                    |
| 8. Low physical activity                      | 8. Occupational risks                         | -19.5                          | 50.8                                    |
| 9. Occupational risks                         | 9. Low physical activity                      | -46.5                          | 0.20                                    |
| 10. Air pollution                             | 10. Air pollution                             | -46.7                          | -0.02                                   |
| 11. Low bone mineral density                  | 11. Low bone mineral density                  | 16.9                           | 119                                     |
| 12. Other environmental risks                 | 12. Alcohol and drug use                      | 1220                           | 2375                                    |
| 13. Unsafe sex                                | 13. Unsafe sex                                | -29.6                          | 31.9                                    |
| 14. Alcohol and drug use                      | 14. Other environmental risks                 | -46.1                          | 0.98                                    |
| 15. Sexual abuse and violence                 | 15. Unsafe water, sanitation, and handwashing | 130                            | 332                                     |
| 16. Unsafe water, sanitation, and handwashing | 16. Sexual abuse and violence                 | -10.5                          | 67.8                                    |
| 17. Child and maternal malnutrition           | 17. Child and maternal malnutrition           | 7.89                           | 102                                     |

Behavioural risks
  Metabolic risks
  Environmental/occupational risks
